# Supplementary material for: Does predictability of fluxes vary between FLUXNET sites?
Source: Copernicus journal article supplement (doi:10.5194/bg-2018-179), 2018-04-20
Supplement: Supplementary file 1 [file bg-2018-179-supplement.pdf]

1 How unique are fluxes from different FLUXNET sites?

2

### 3 **Extended Budyko Analysis**

4 The following 2 plots show predictability metrics for Potential and Actual evapotranspiration.

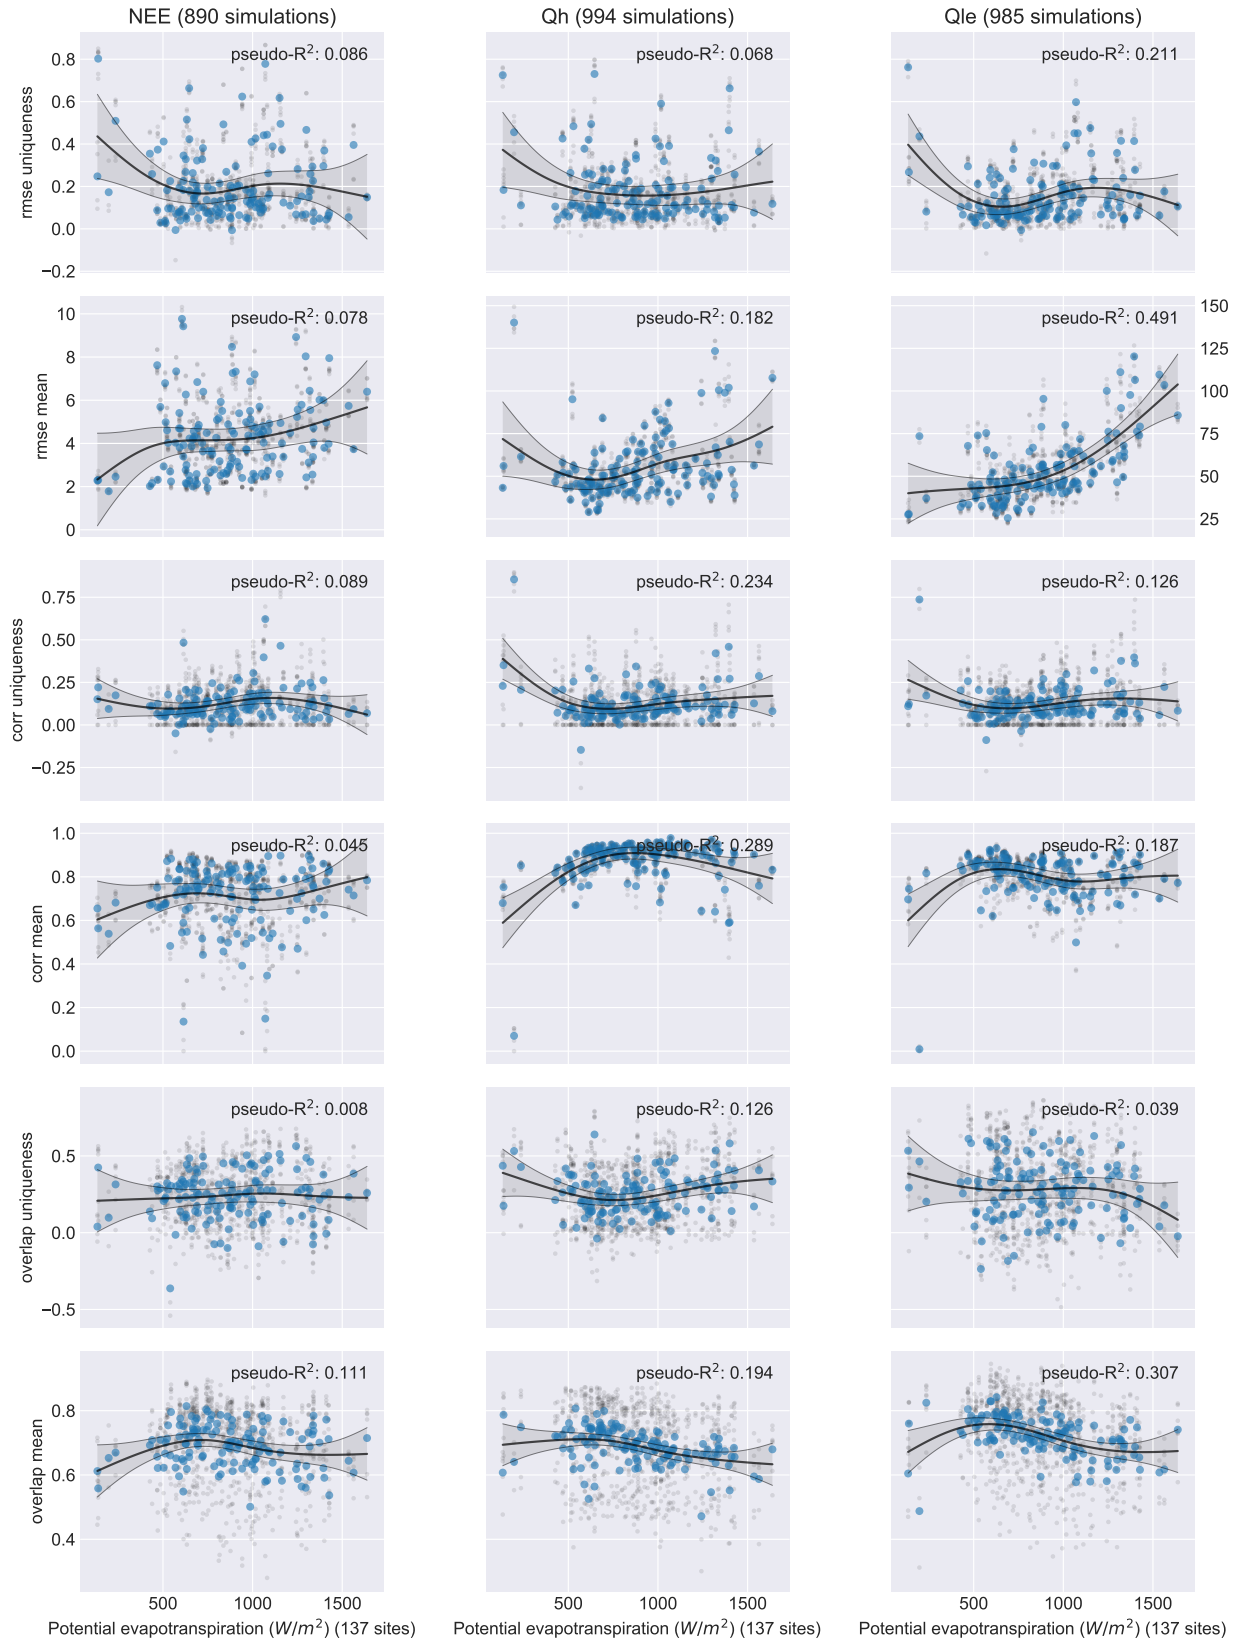

Predictability metrics for Potential Evapotranspiration (PET).

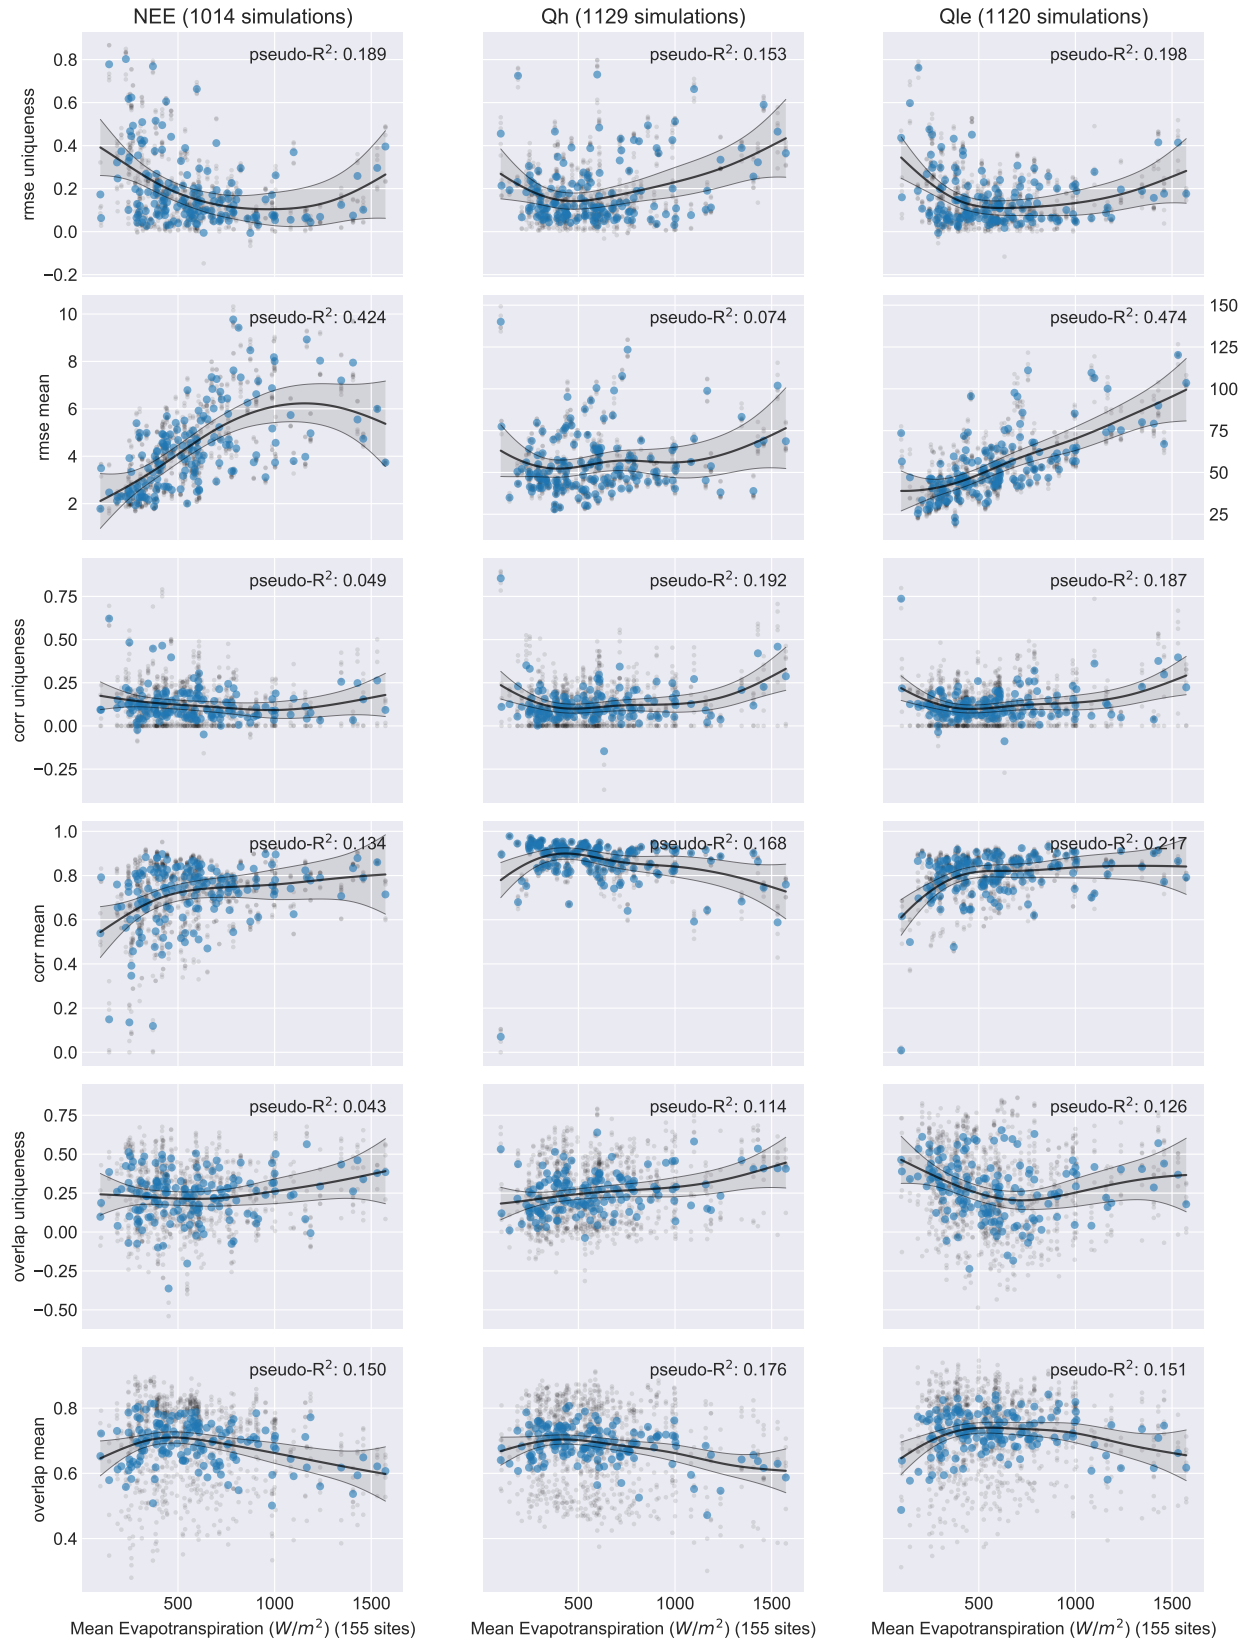

Predictability metrics for Actual Evapotranspiration.

## 5 Extended BioClim plots

6 The following figures use the WorldClim BioClim variables.

- 7 • Figure 1 shows the remaining predictability metrics for diurnal temperature range,
- 8 • Figure 2 shows isothermality,
- 9 • Figure 3 shows temperature seasonality,
- 10 • Figure 4 temperature annual range,
- 11 • Figure 5 precipitation seasonality,
- 12 • Figure 6 precipitation of wettest quarter, and
- 13 • Figure 7 precipitation of the driest quarter.

14 There is a hint of a trend towards higher uniqueness in sites that are driest in their wettest quarter, which is  
15 perhaps simply a reflection of the same effect seen in Figure 3 in the paper. Other determinants do not have  
16 a clear pattern in RMSE uniqueness.

17 There are some other patterns visible in some of the other predictability metrics, for example there appears  
18 to be a trend towards a better overlap metric at sites with a higher BioClim\_t\_annual\_range, as well as sites  
19 with a higher BioClim\_t\_seasonality.

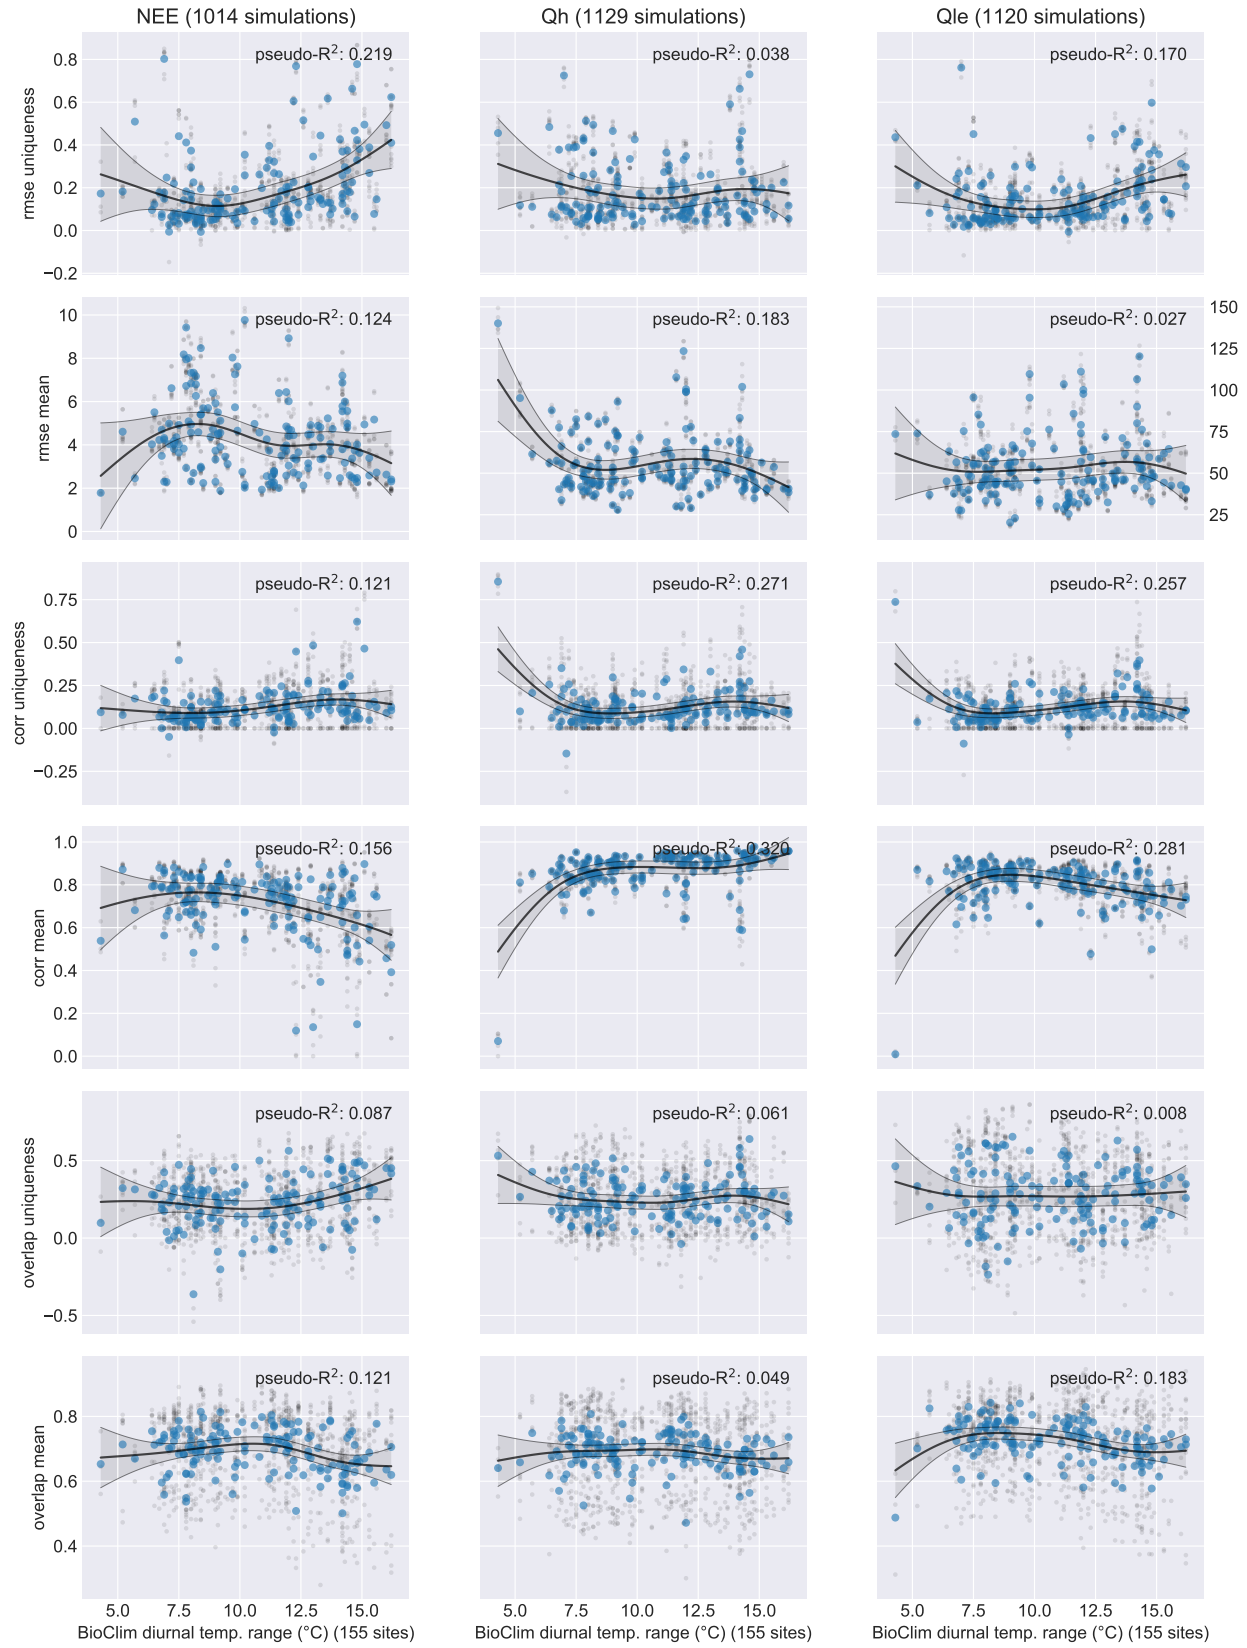

Figure 1: Predictability metrics for temperature diurnal range. Note: The first row is already included in the paper.

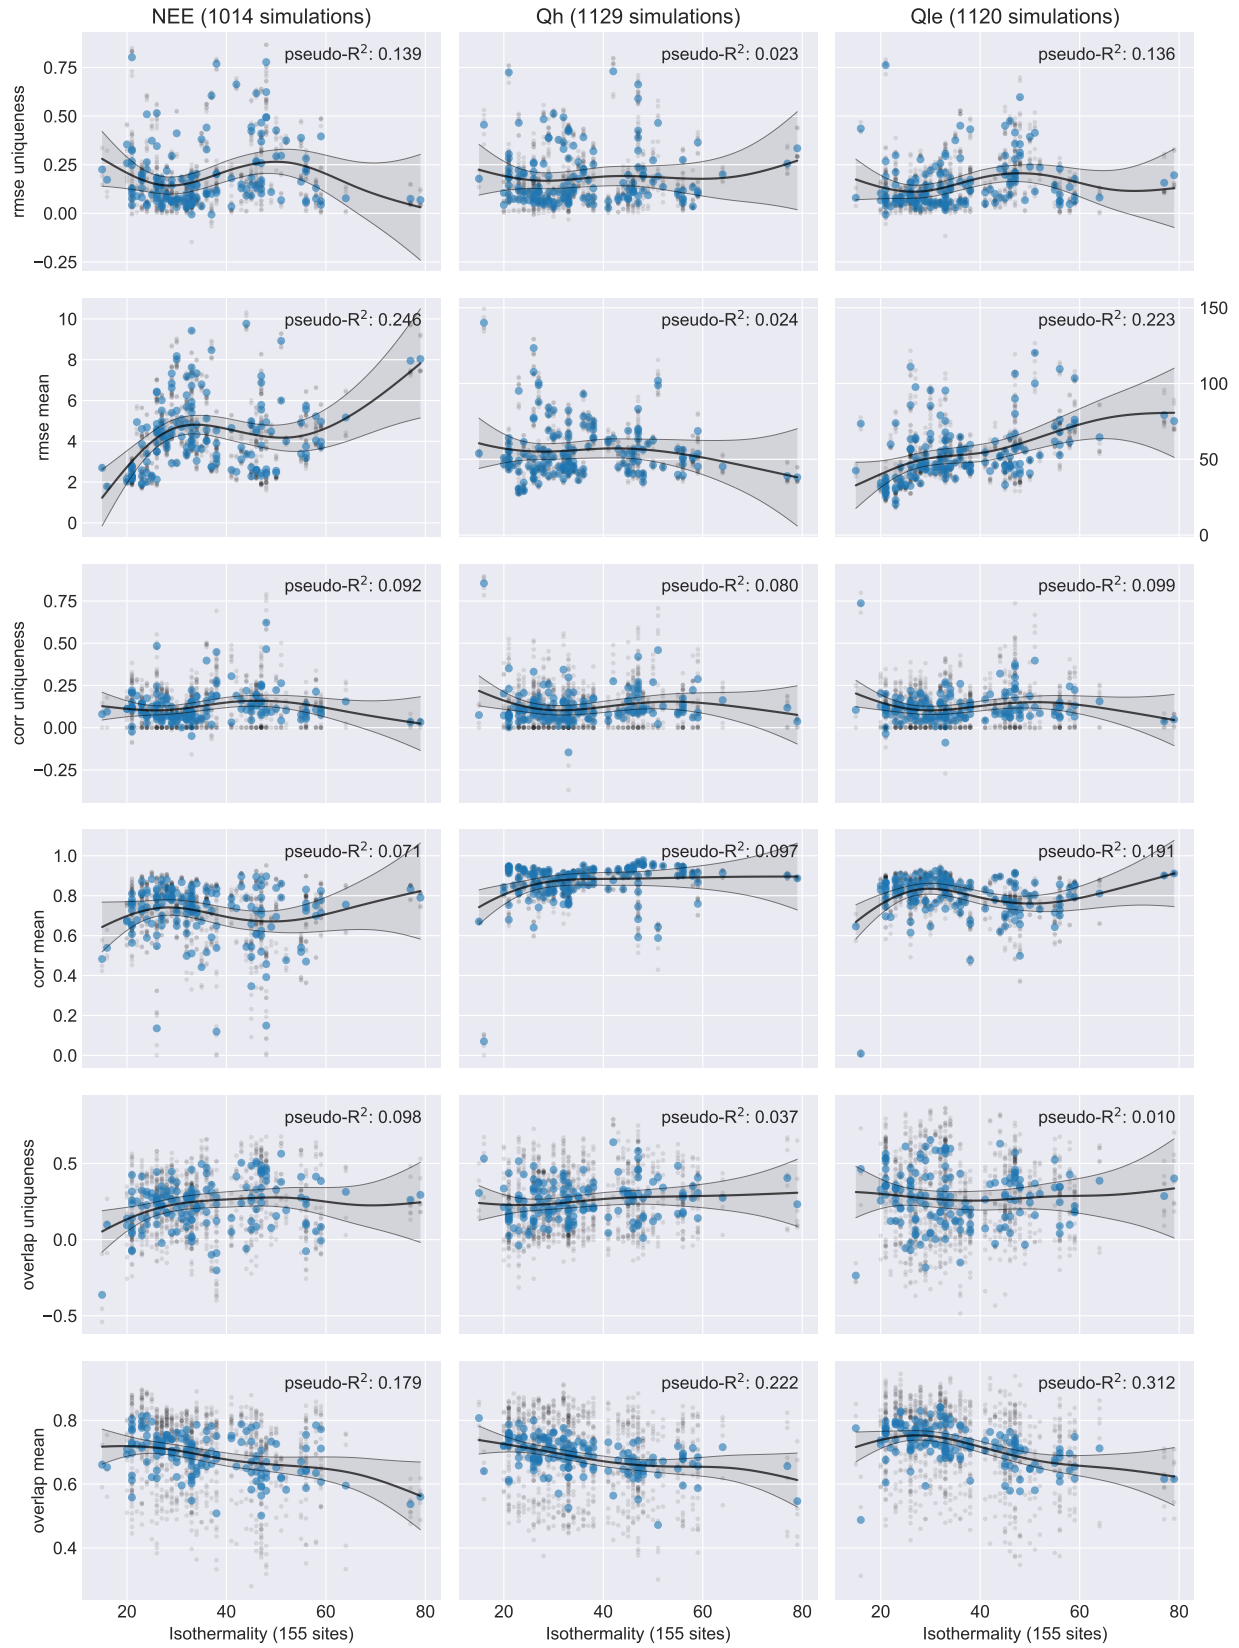

Figure 2: Predictability metrics for temperature isothermality.

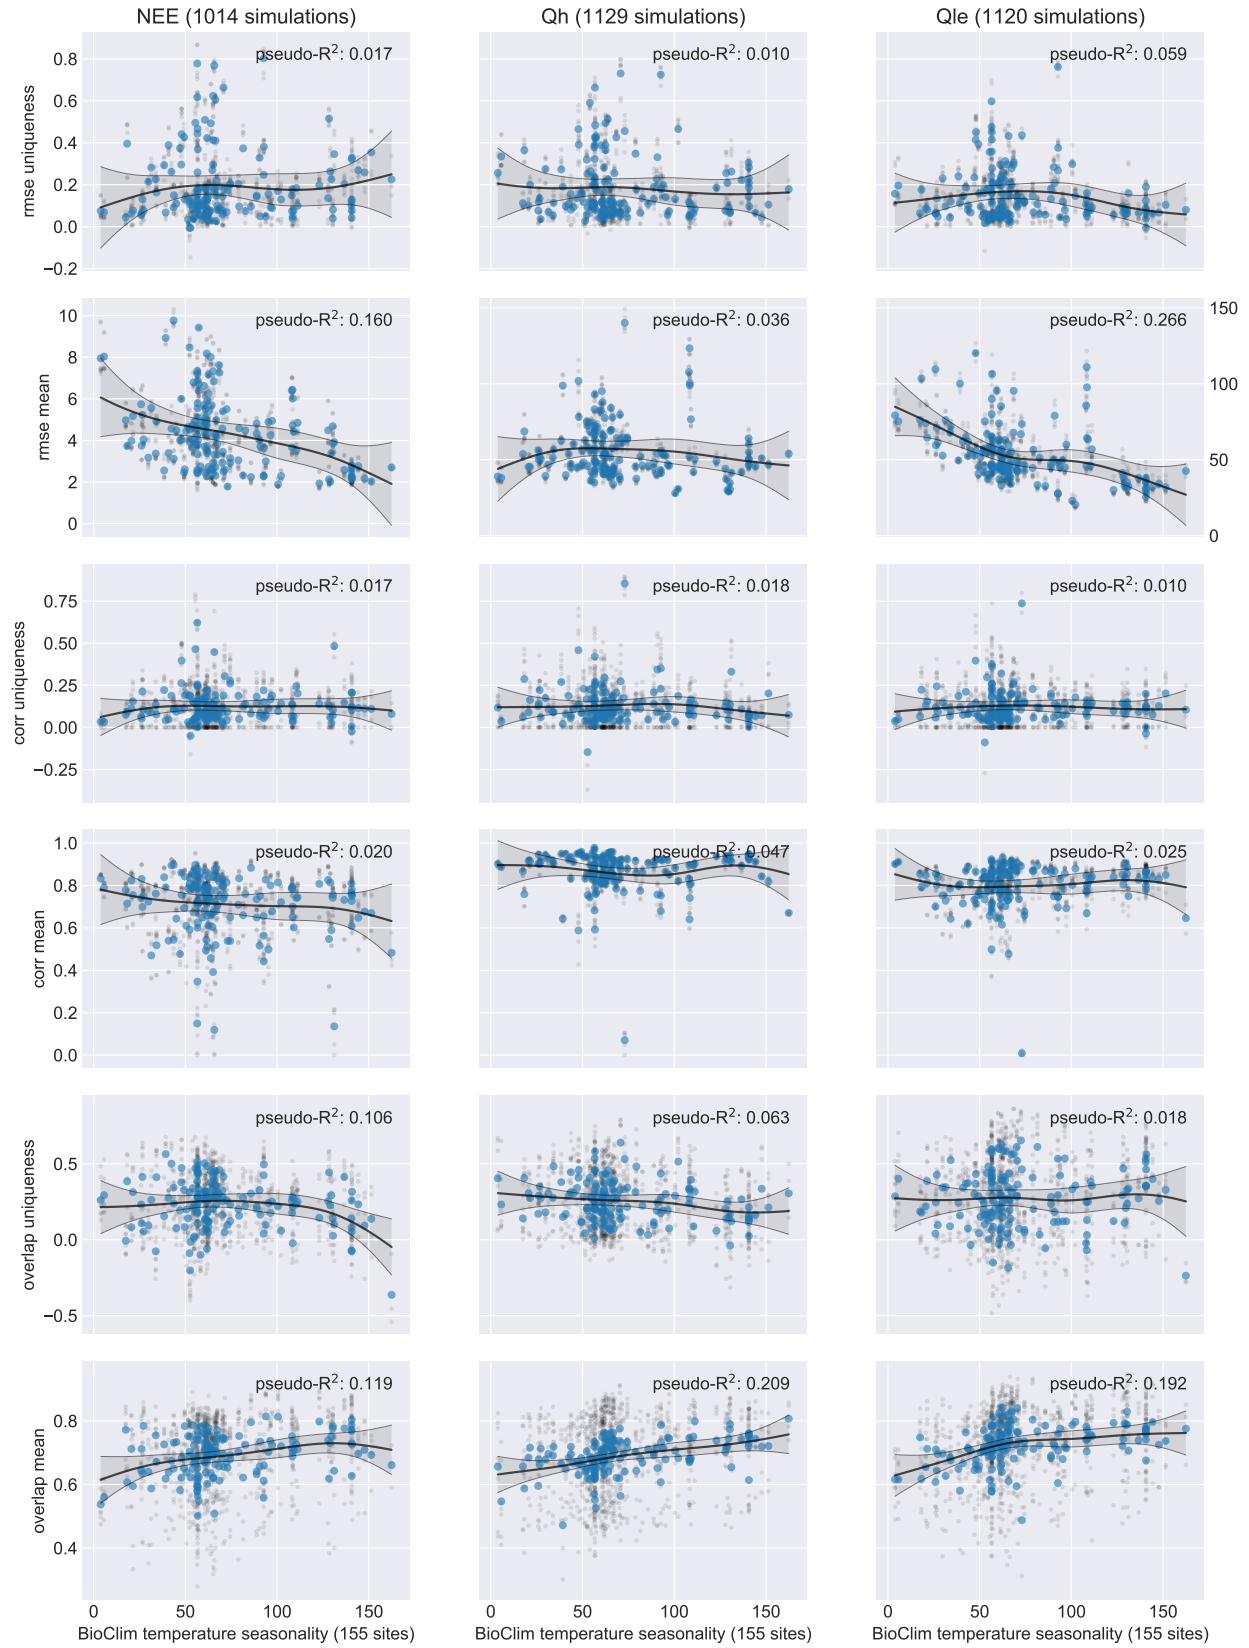

Figure 3: Predictability metrics for temperature seasonality.

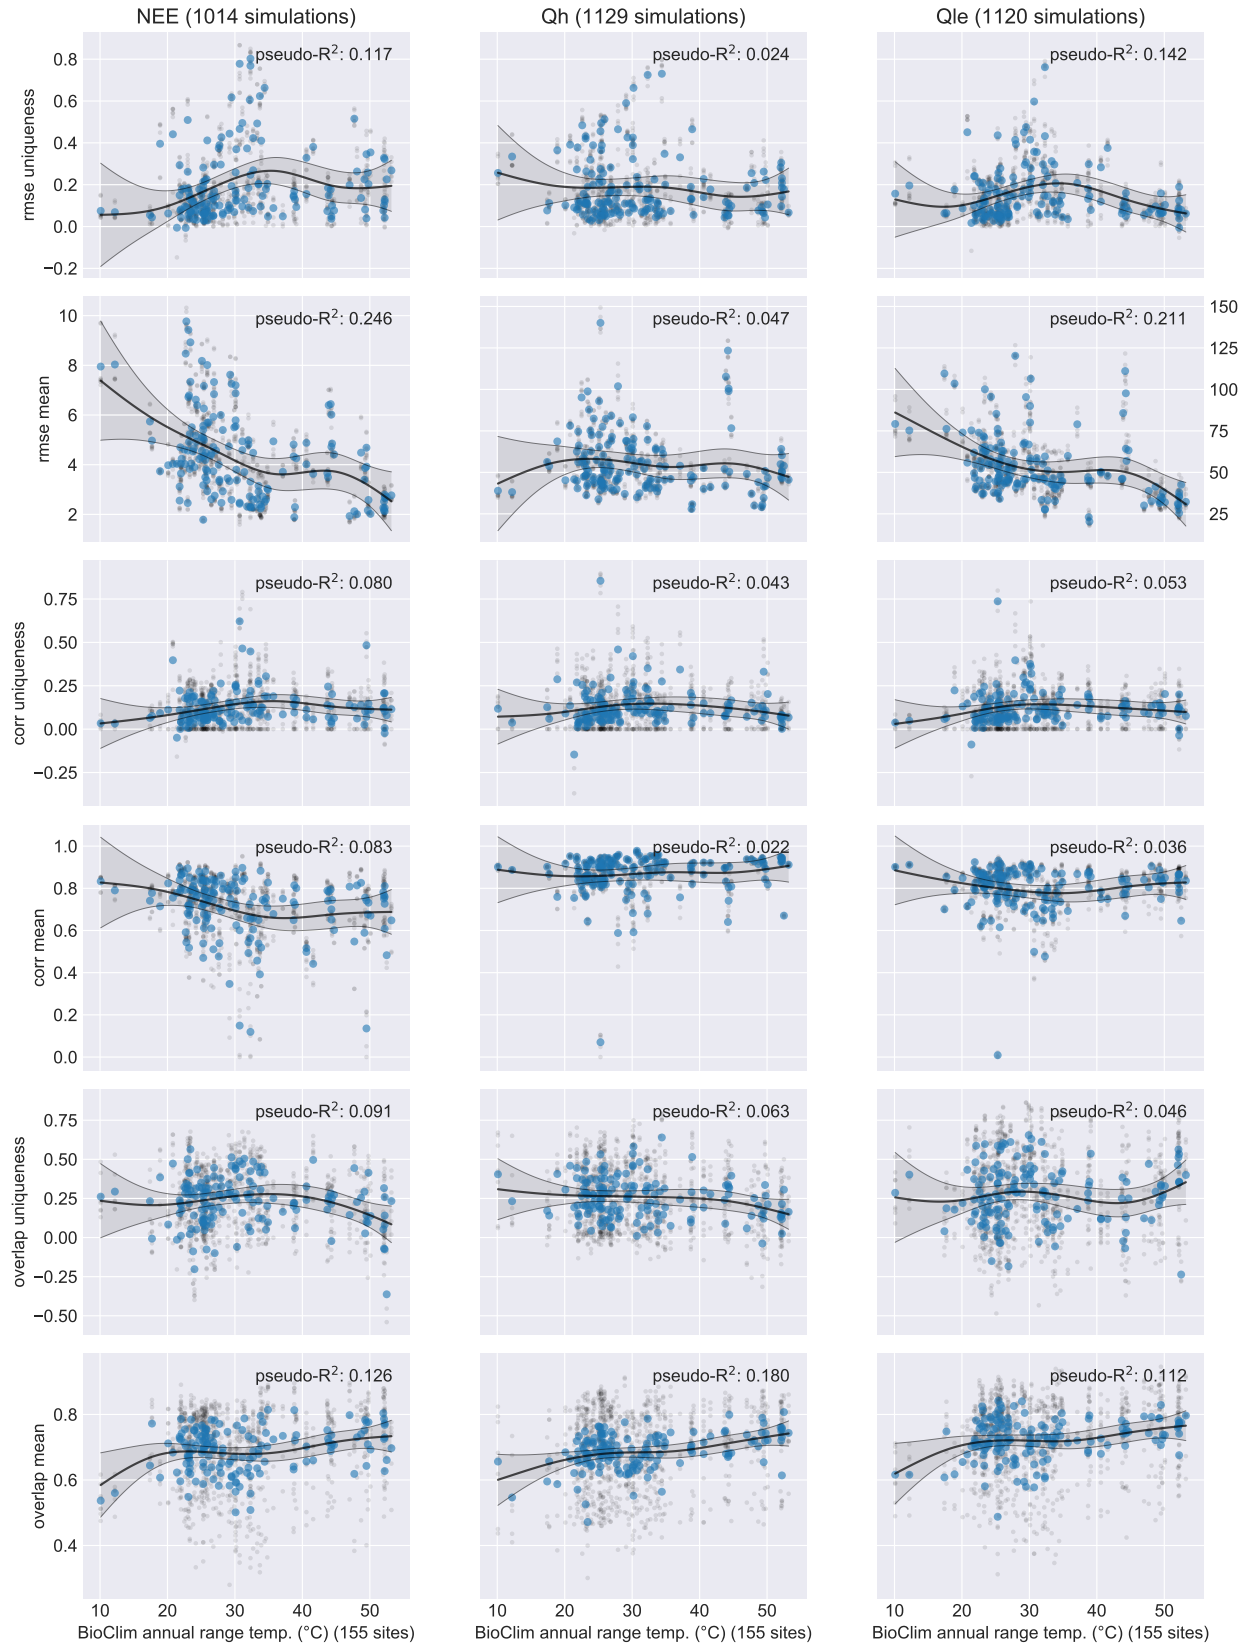

Figure 4: Predictability metrics for temperature annual range.



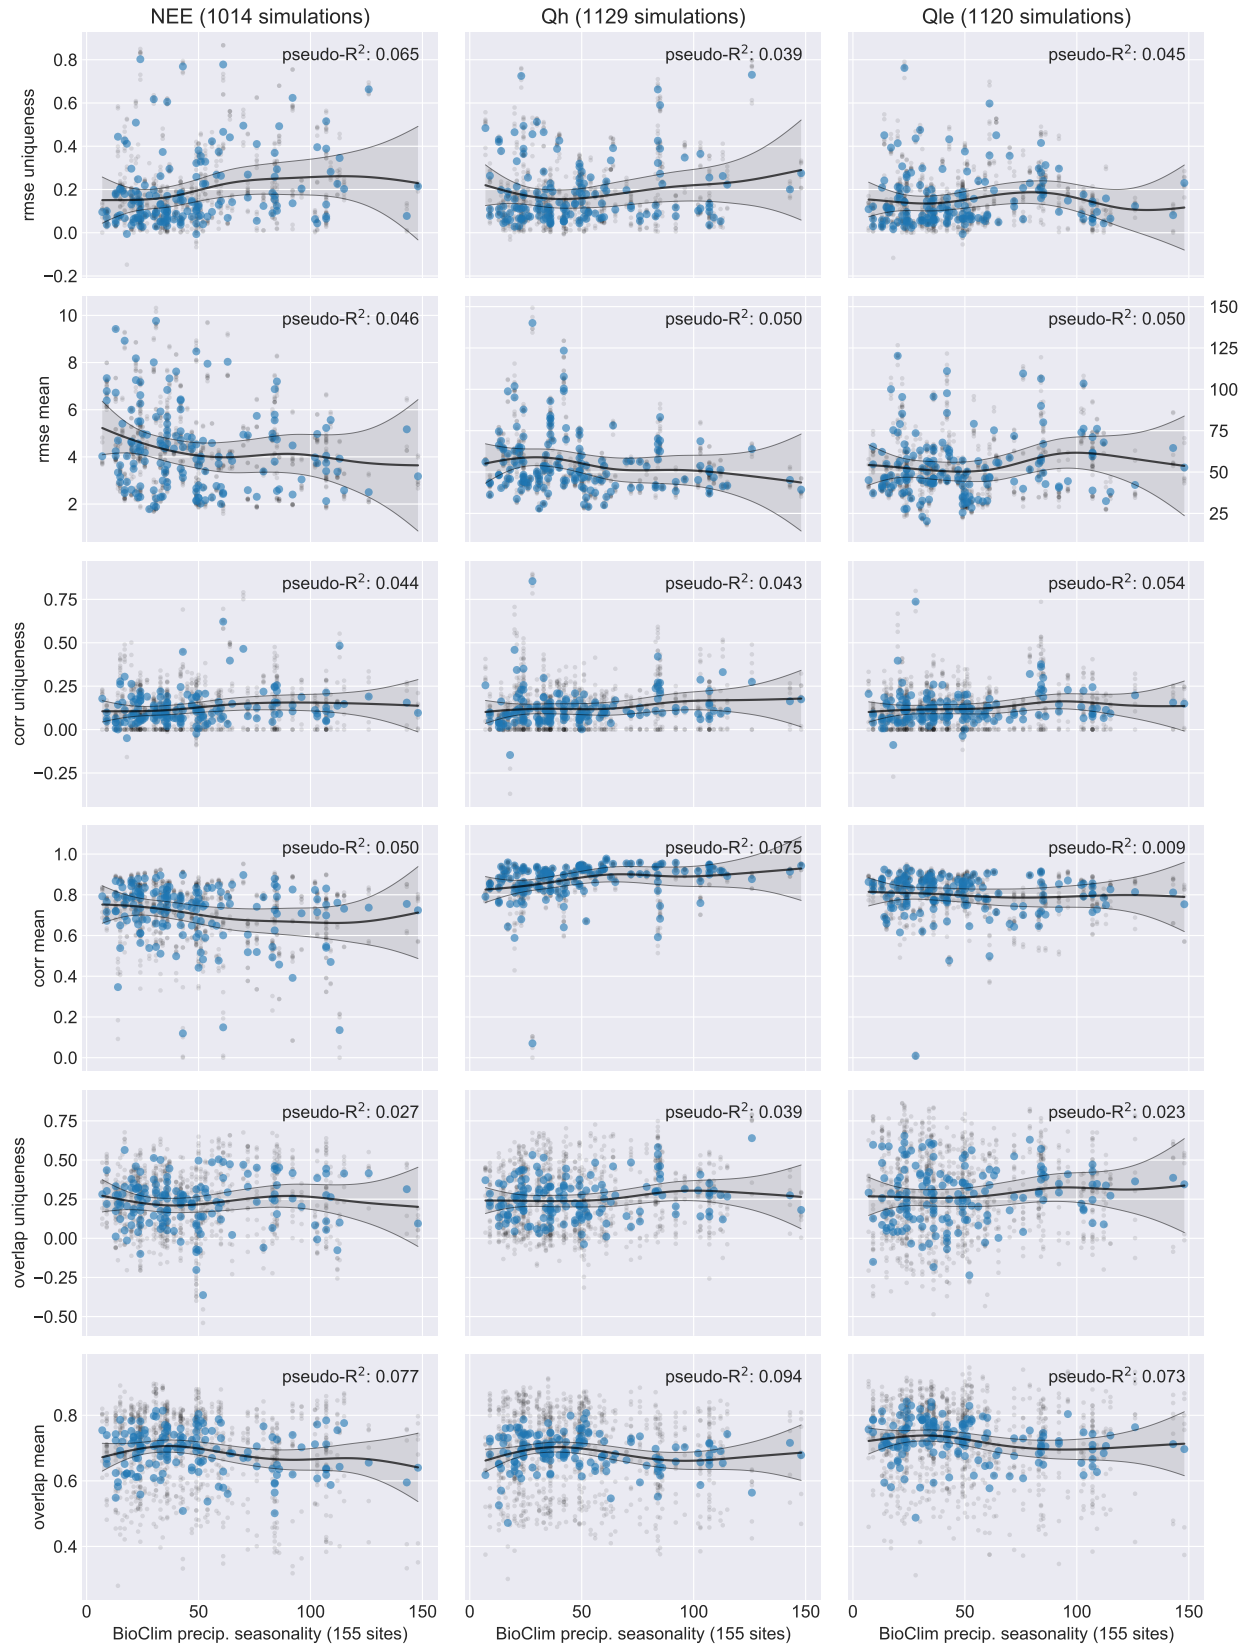

Figure 5: Predictability metrics for rainfall seasonality.

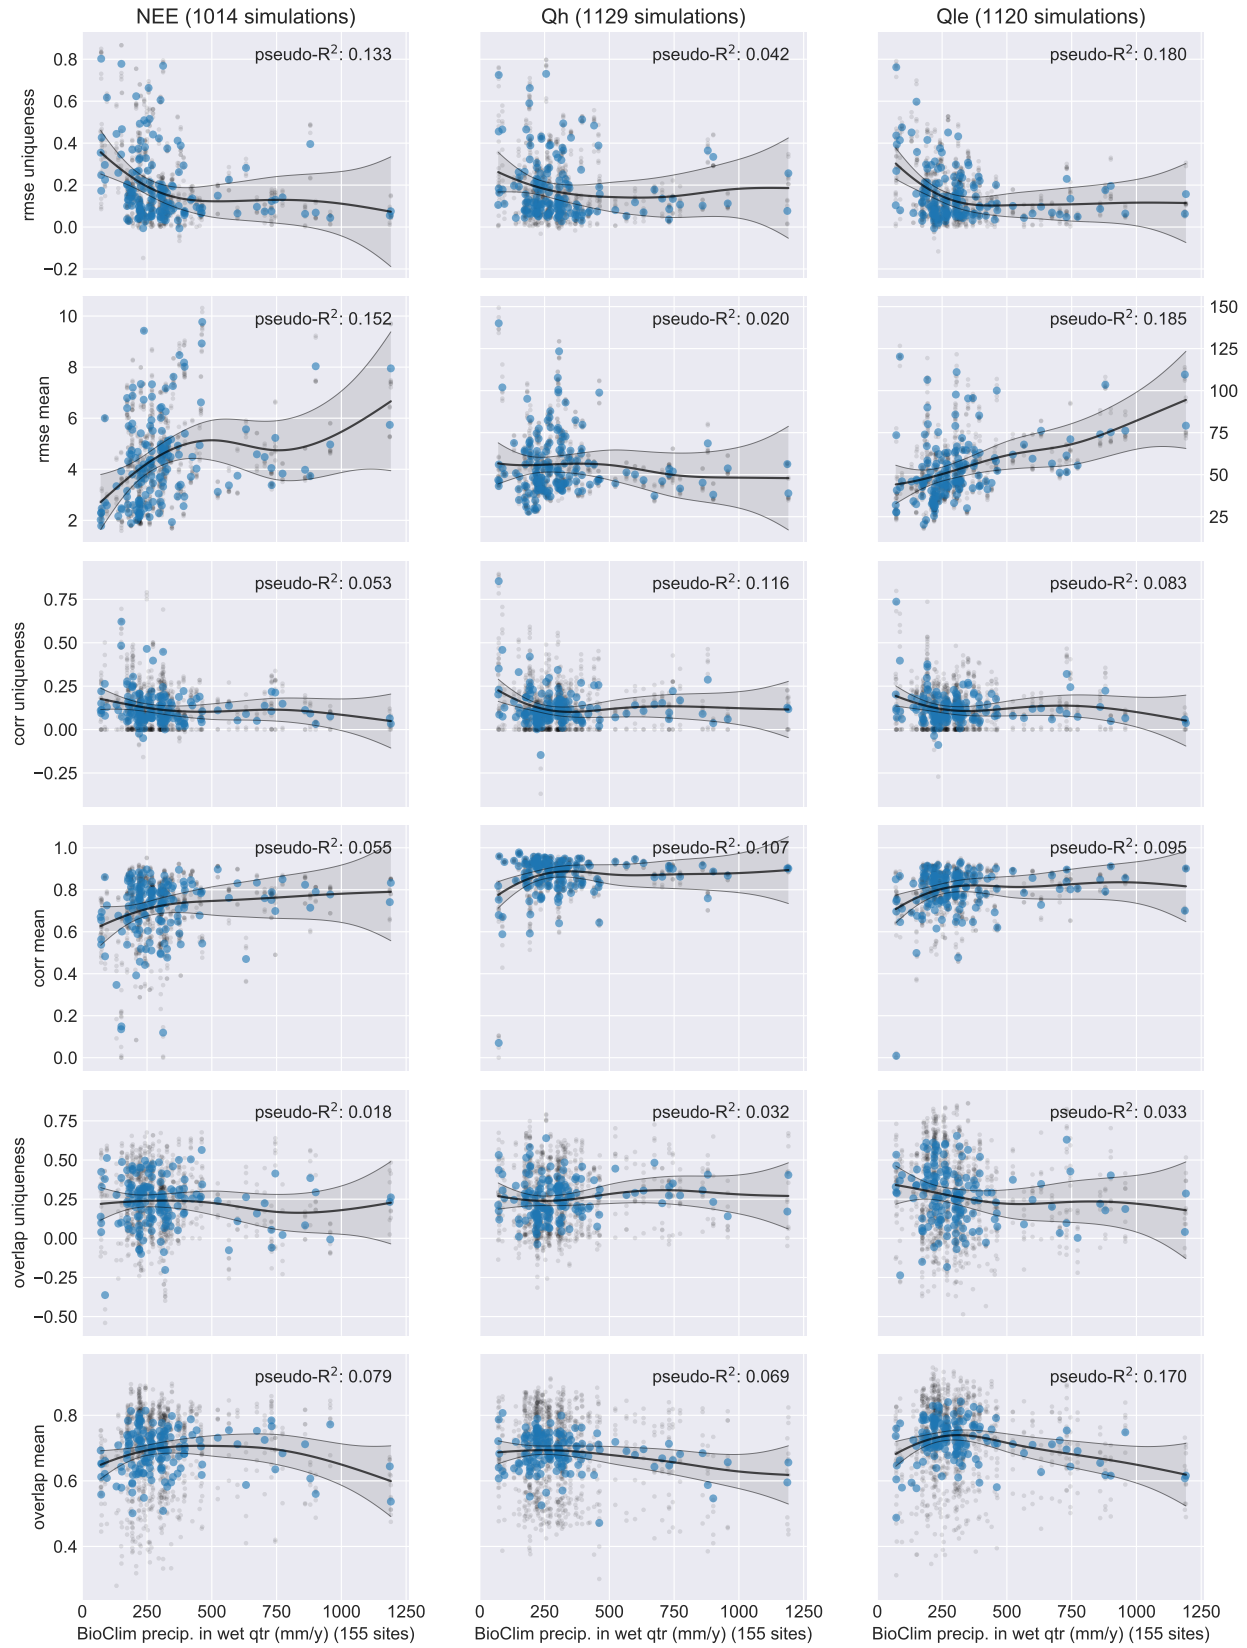

Figure 6: Predictability metrics for precipitation of the wettest quarter.

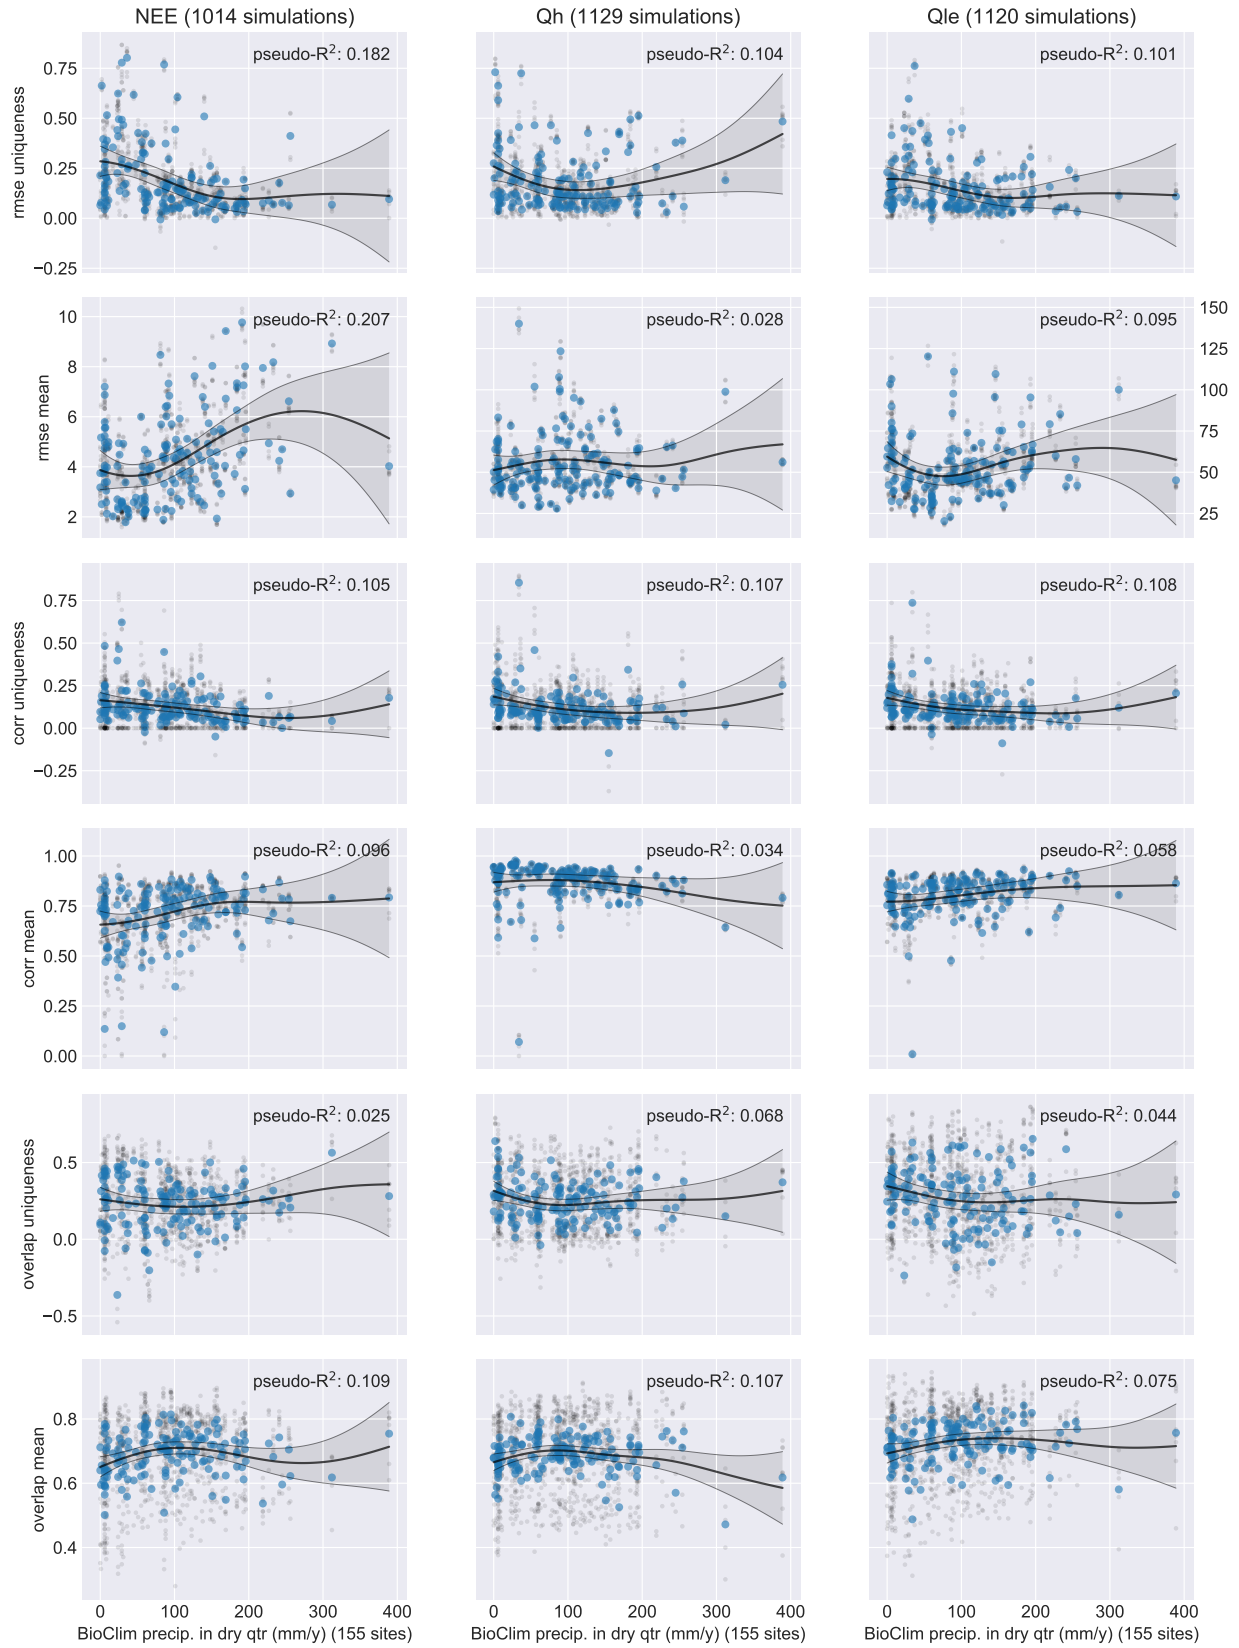

Figure 7: Predictability metrics for precipitation of the driest quarter.

20 **Extended Vegetation type analysis**

21 This figure shows the other predictability metrics for grouped vegetation type which were omitted from the  
22 paper.

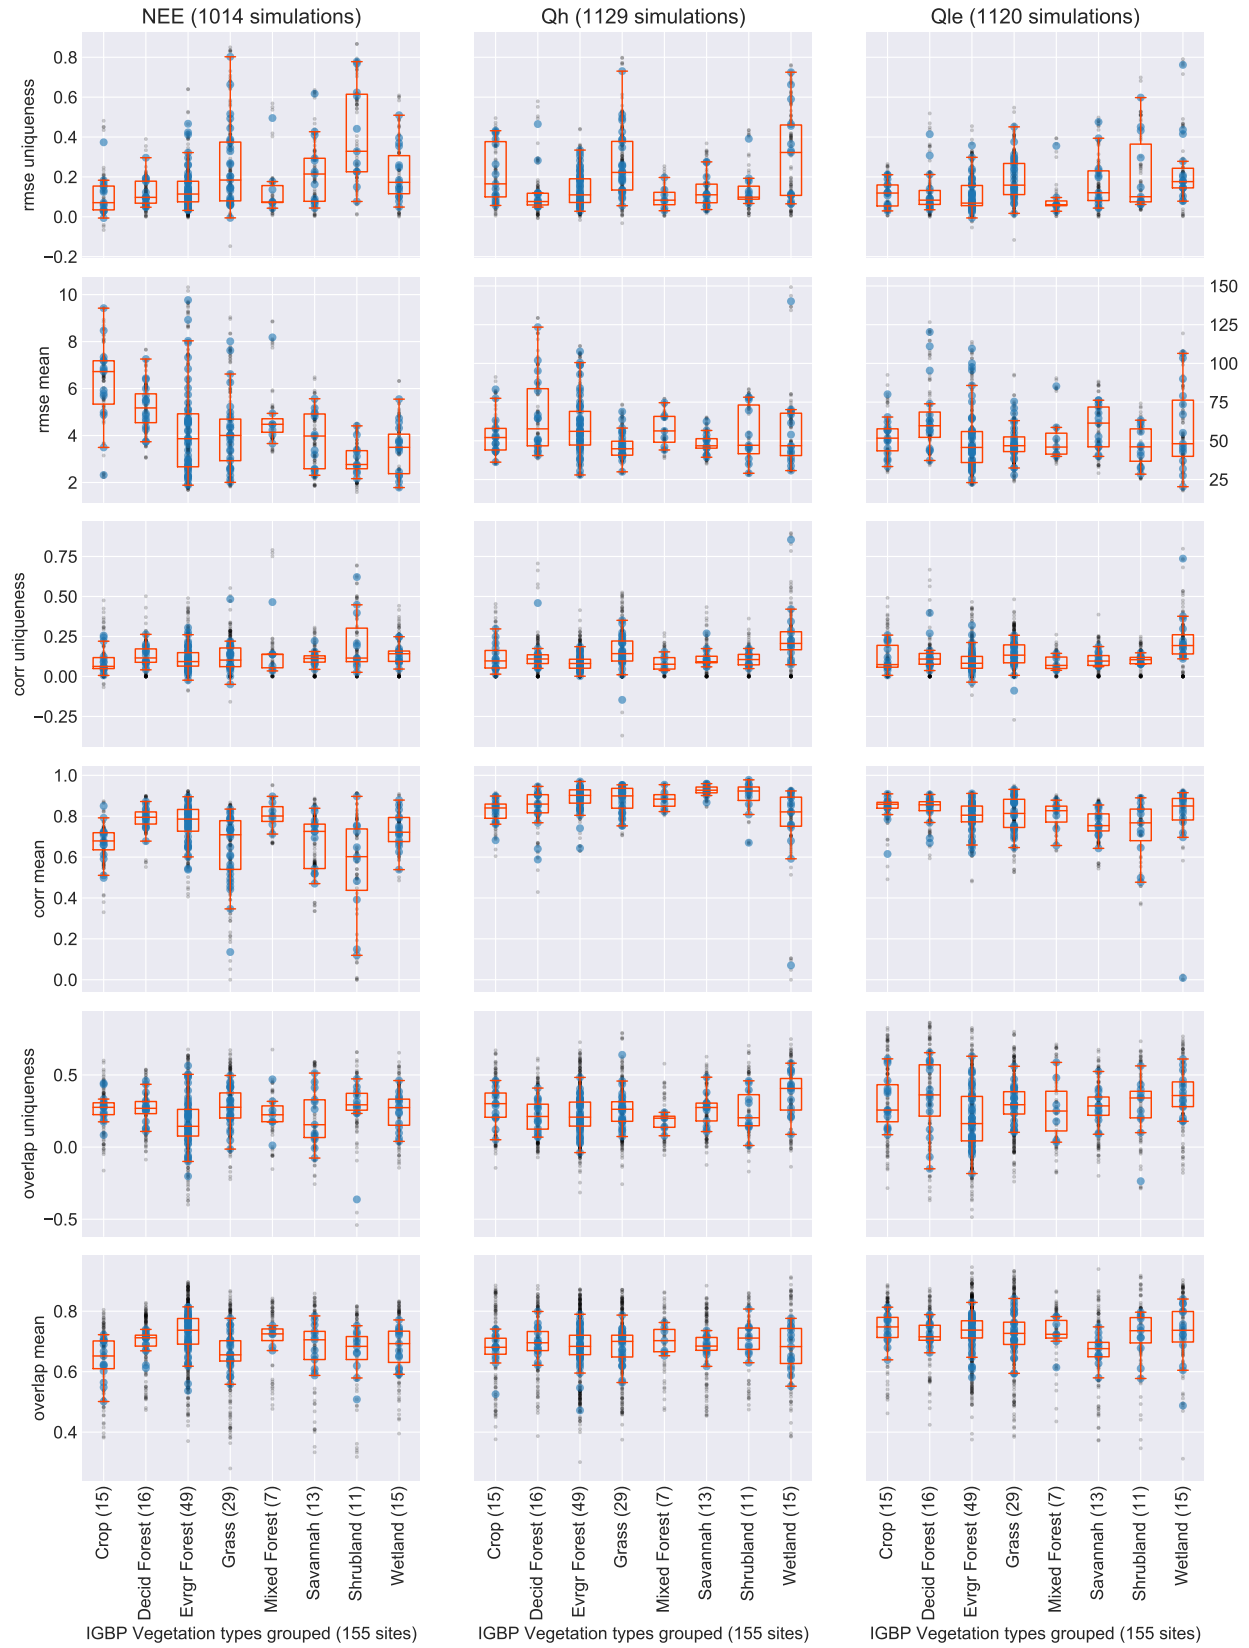

Figure 8: Predictability metrics for vegetation type (grouped, see Methods).

23 **Extended Geographic analysis**

24 This section includes maps of RMSE uniqueness mean for Qh and Qle, mapped as per Figure 11 in the paper,  
25 as well as the remaining remoteness metrics, as per Figure 12. Distribution of uniqueness appears to be  
26 different for Qh (more high-uniqueness sites), but over-all, both variables have a similar, but less distinct  
27 pattern of uniqueness as seen in NEE in Figure 11.

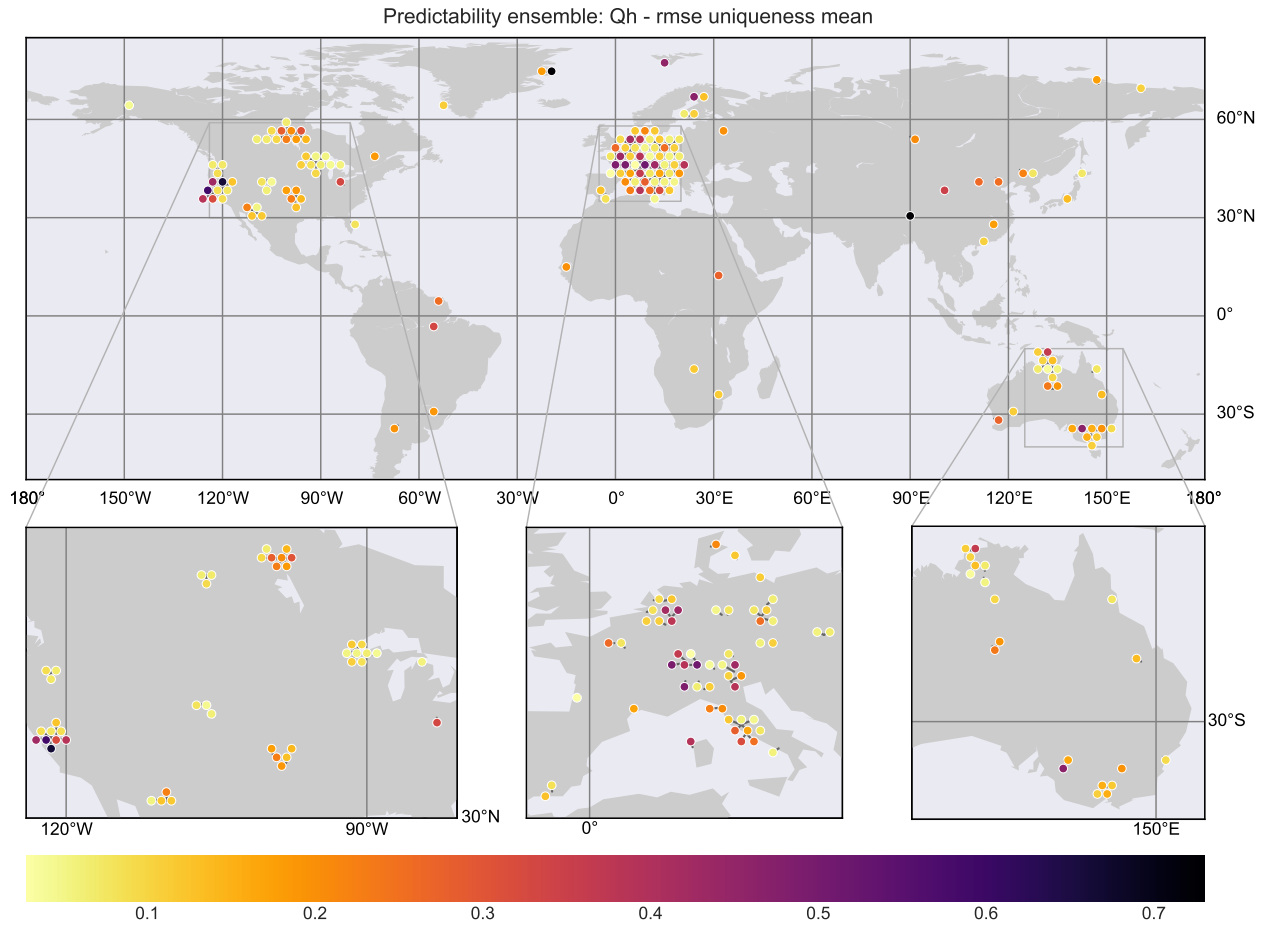

Figure 9: Map of Qh predictability - RMSE uniqueness, averaged across models, as per Figure 11 in the paper.

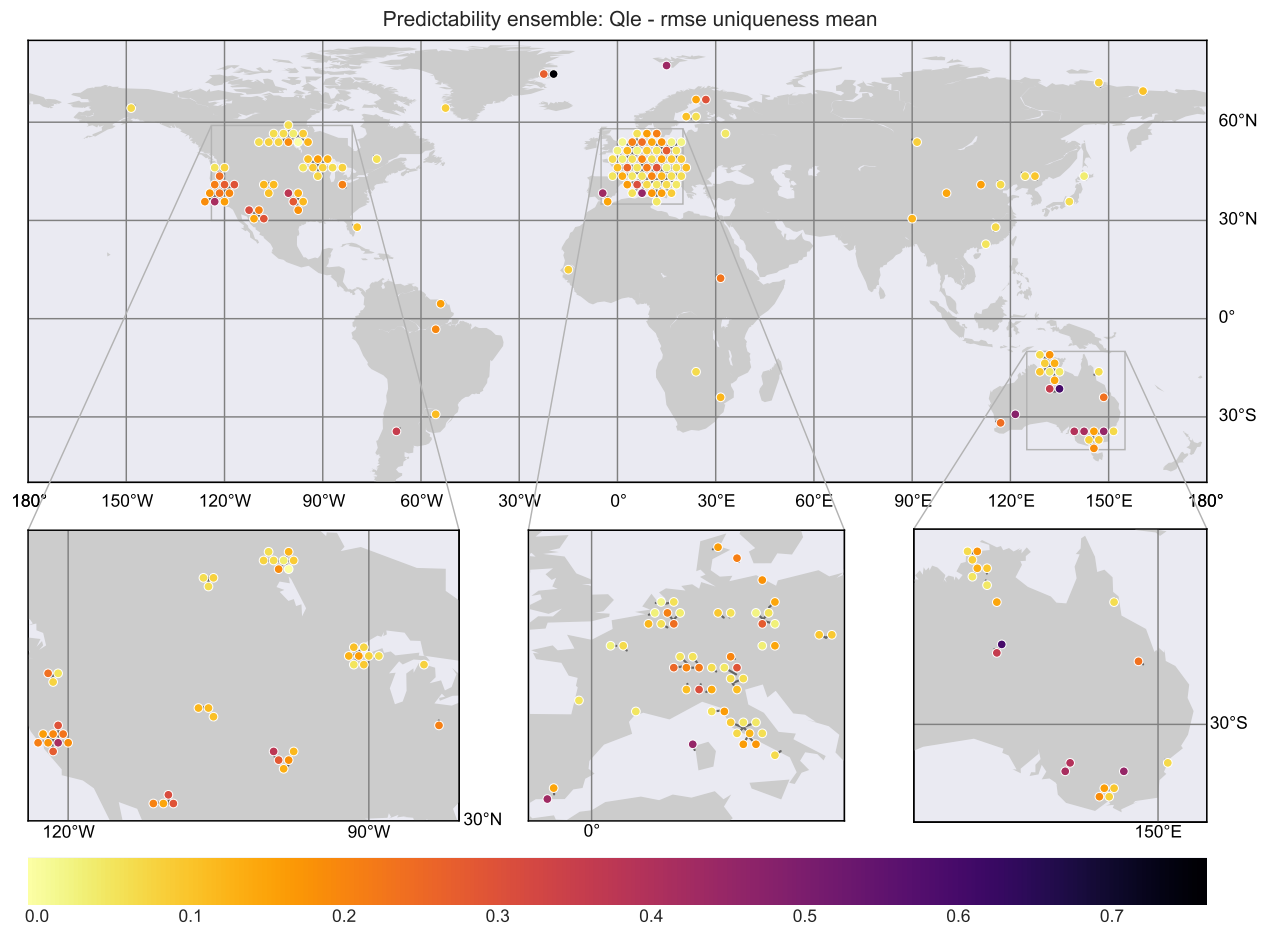

Figure 10: Map of Qle predictability - RMSE uniqueness, averaged across models, as per Figure 11 in the paper.

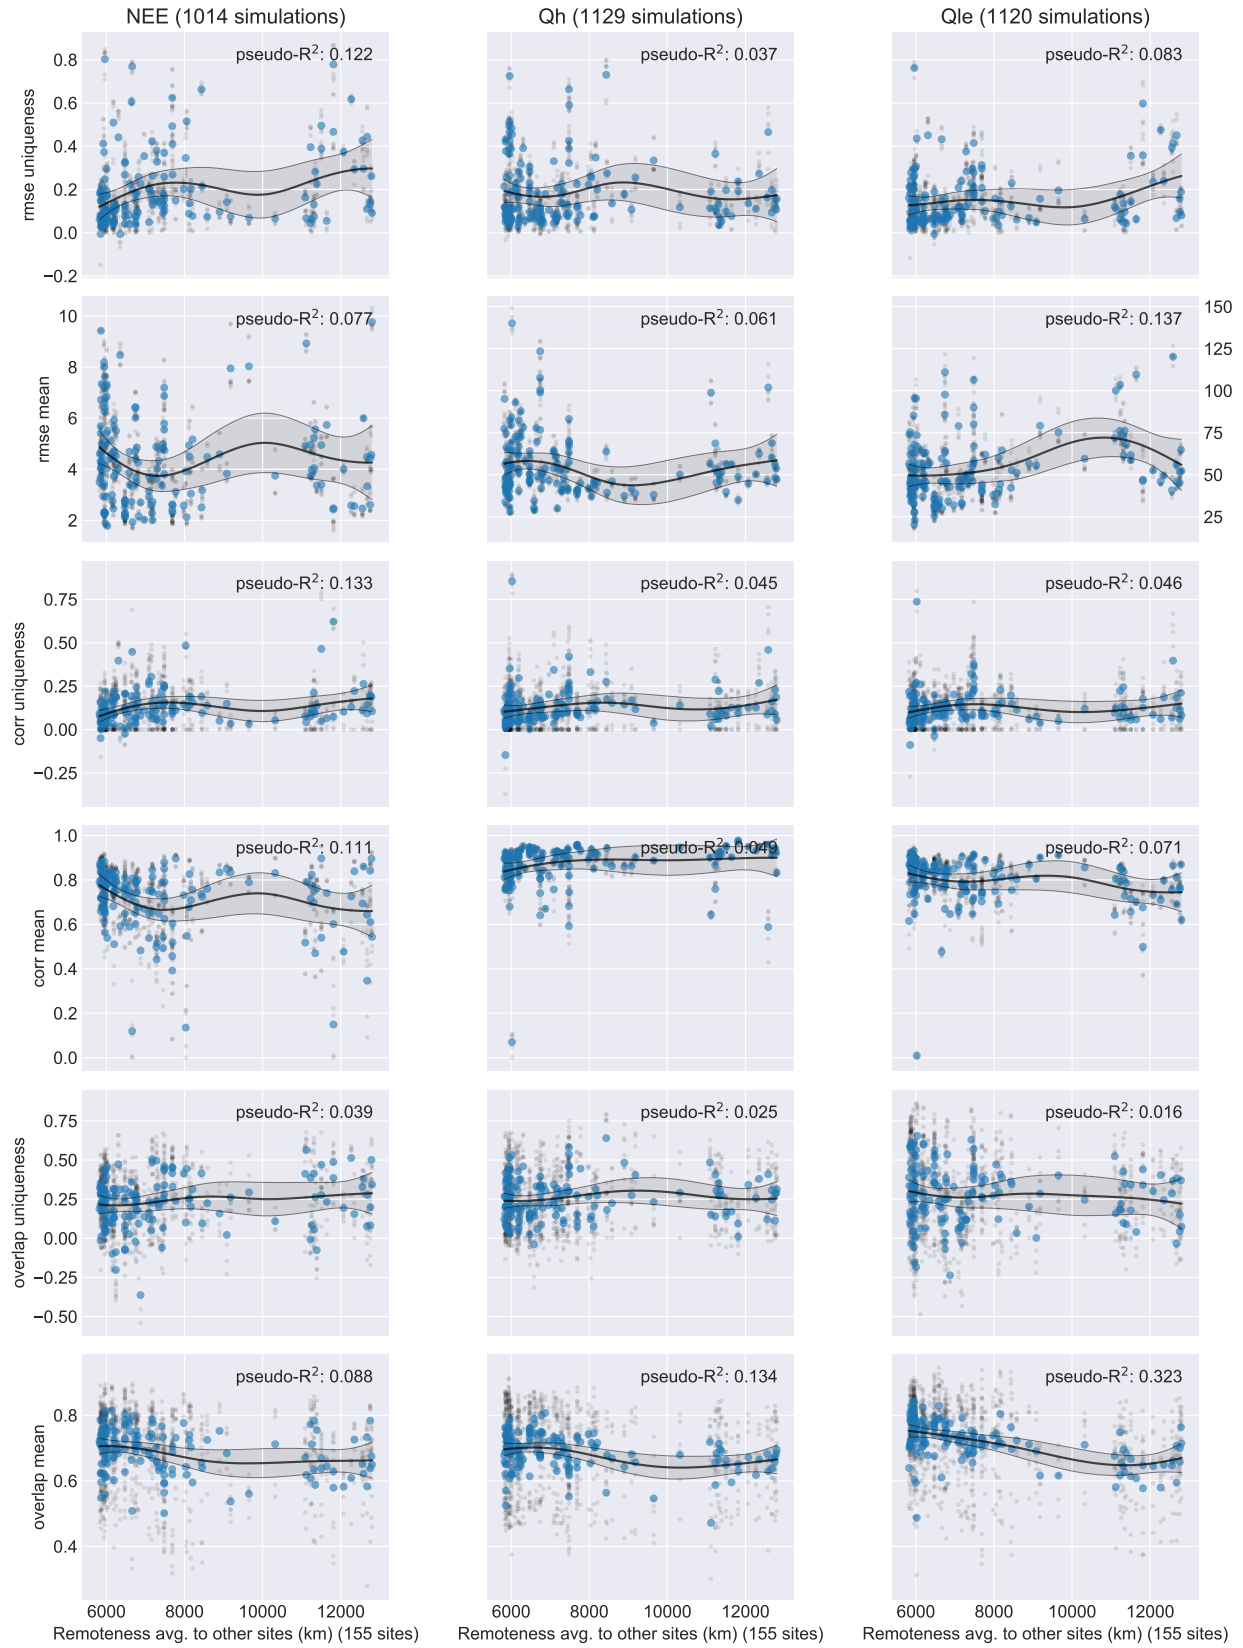

Predictability metrics by RMSE uniqueness



## 28 **Energy Gap Closure analysis**

29 The energy closure problem in FLUXNET is investigated in Figure 11, where we show the actual gap (in  
30  $W/m^2$ ), and in Figure 12 where we show the absolute energy gap normalised by Rnet. In the first figure,  
31 there is no trend in any flux. In the second figure, there is appears to be a tend toward higher uncertainty in  
32 sites with large energy gaps relative to their total Rnet, however this trend is quite uncertain, due to the low  
33 number of sites involved.

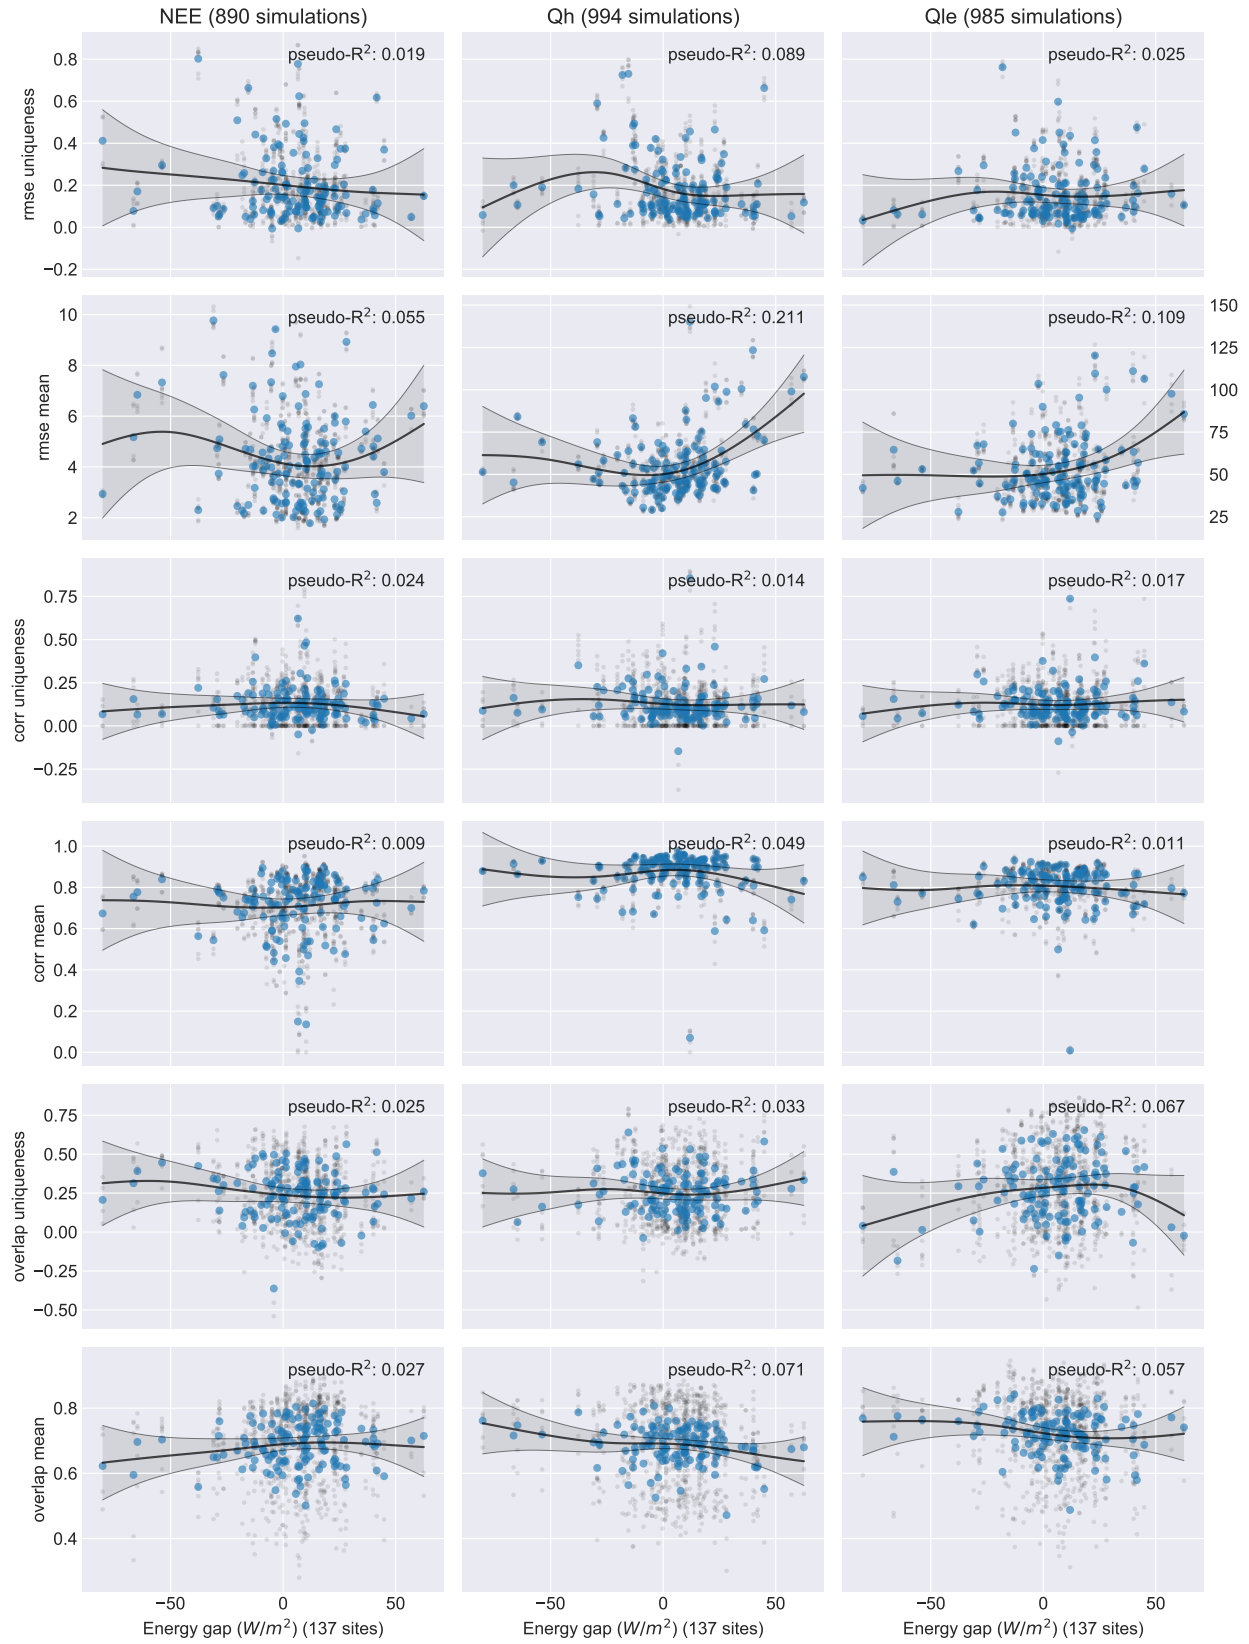

Figure 11: Predictability metrics for energy gap ( $W/m^2$ ). Sites with positive energy gaps have too much Rnet relative to the over heat fluxes.

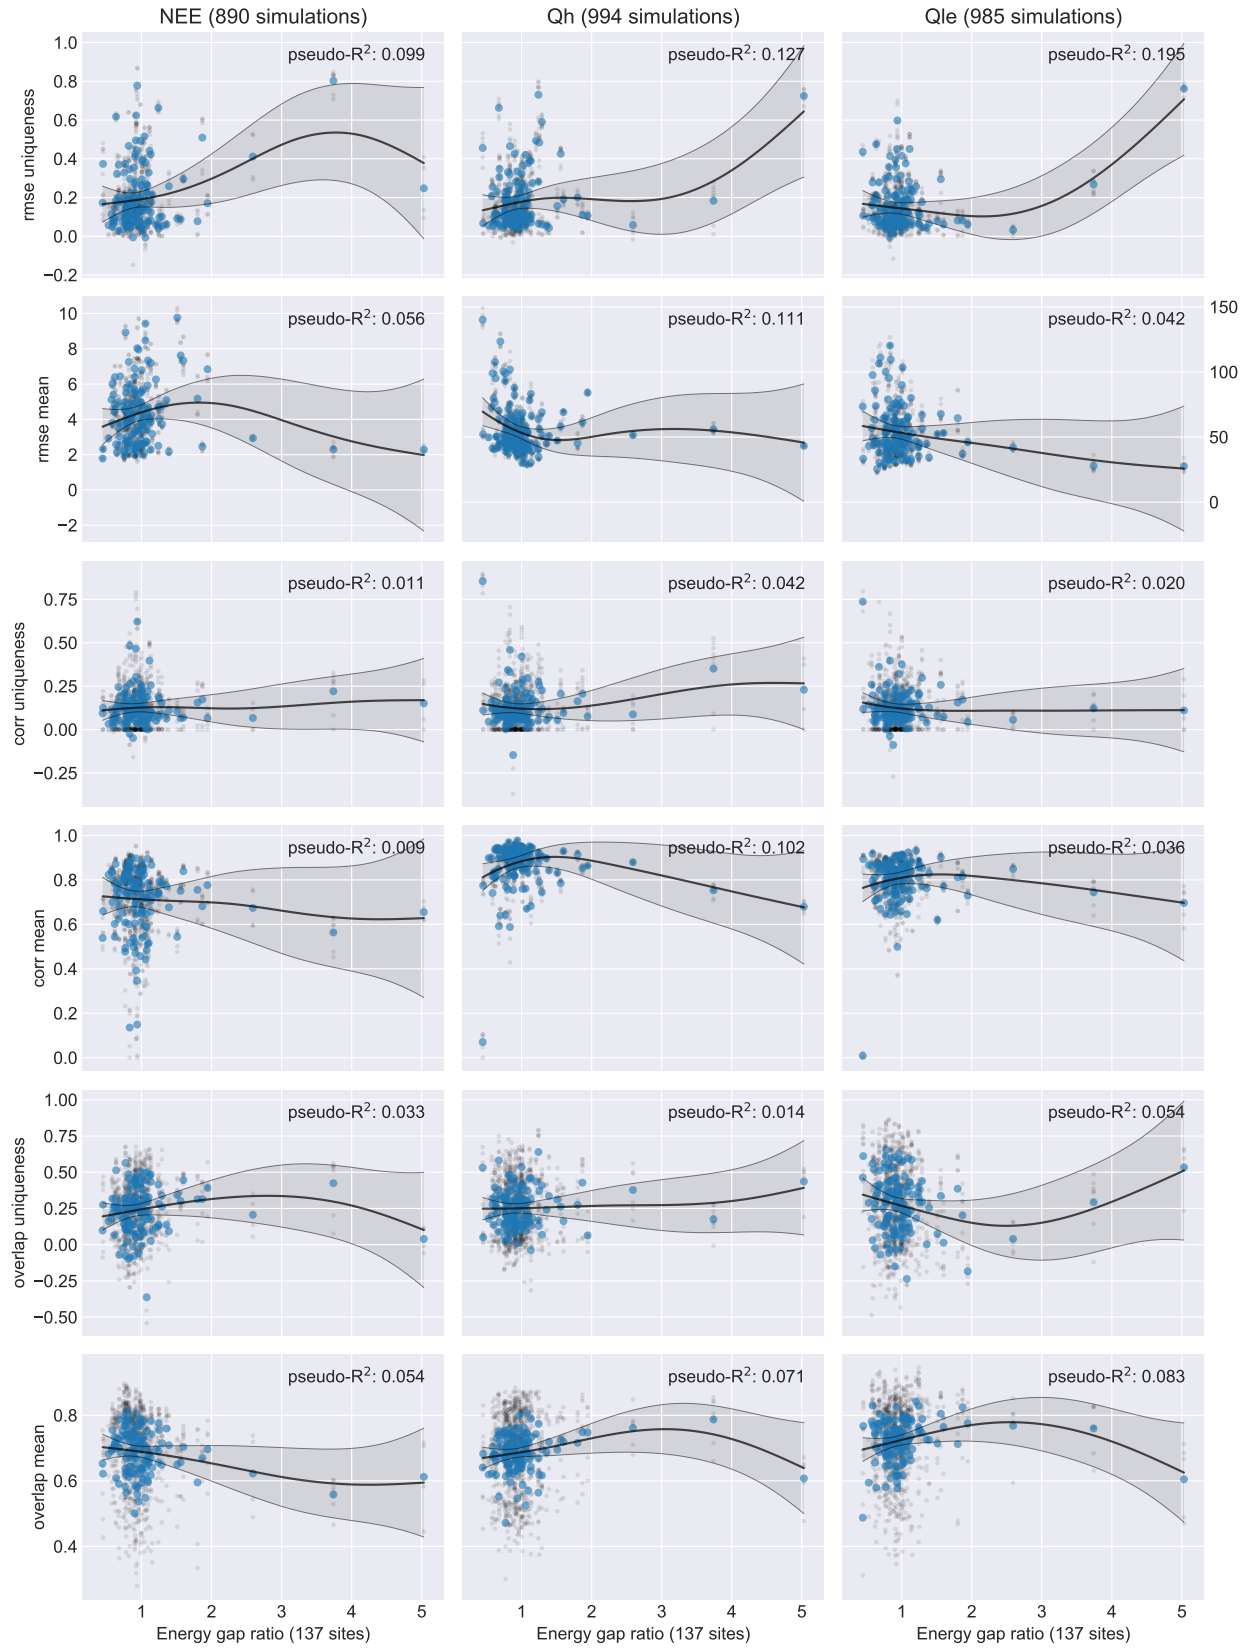

Figure 12: Predictability metrics for energy gap normalised by Rnet.

<sup>34</sup> **Extended dataset length analysis**

<sup>35</sup> The following plot shows the predictability metrics by data set length that were omitted from Figure 13.

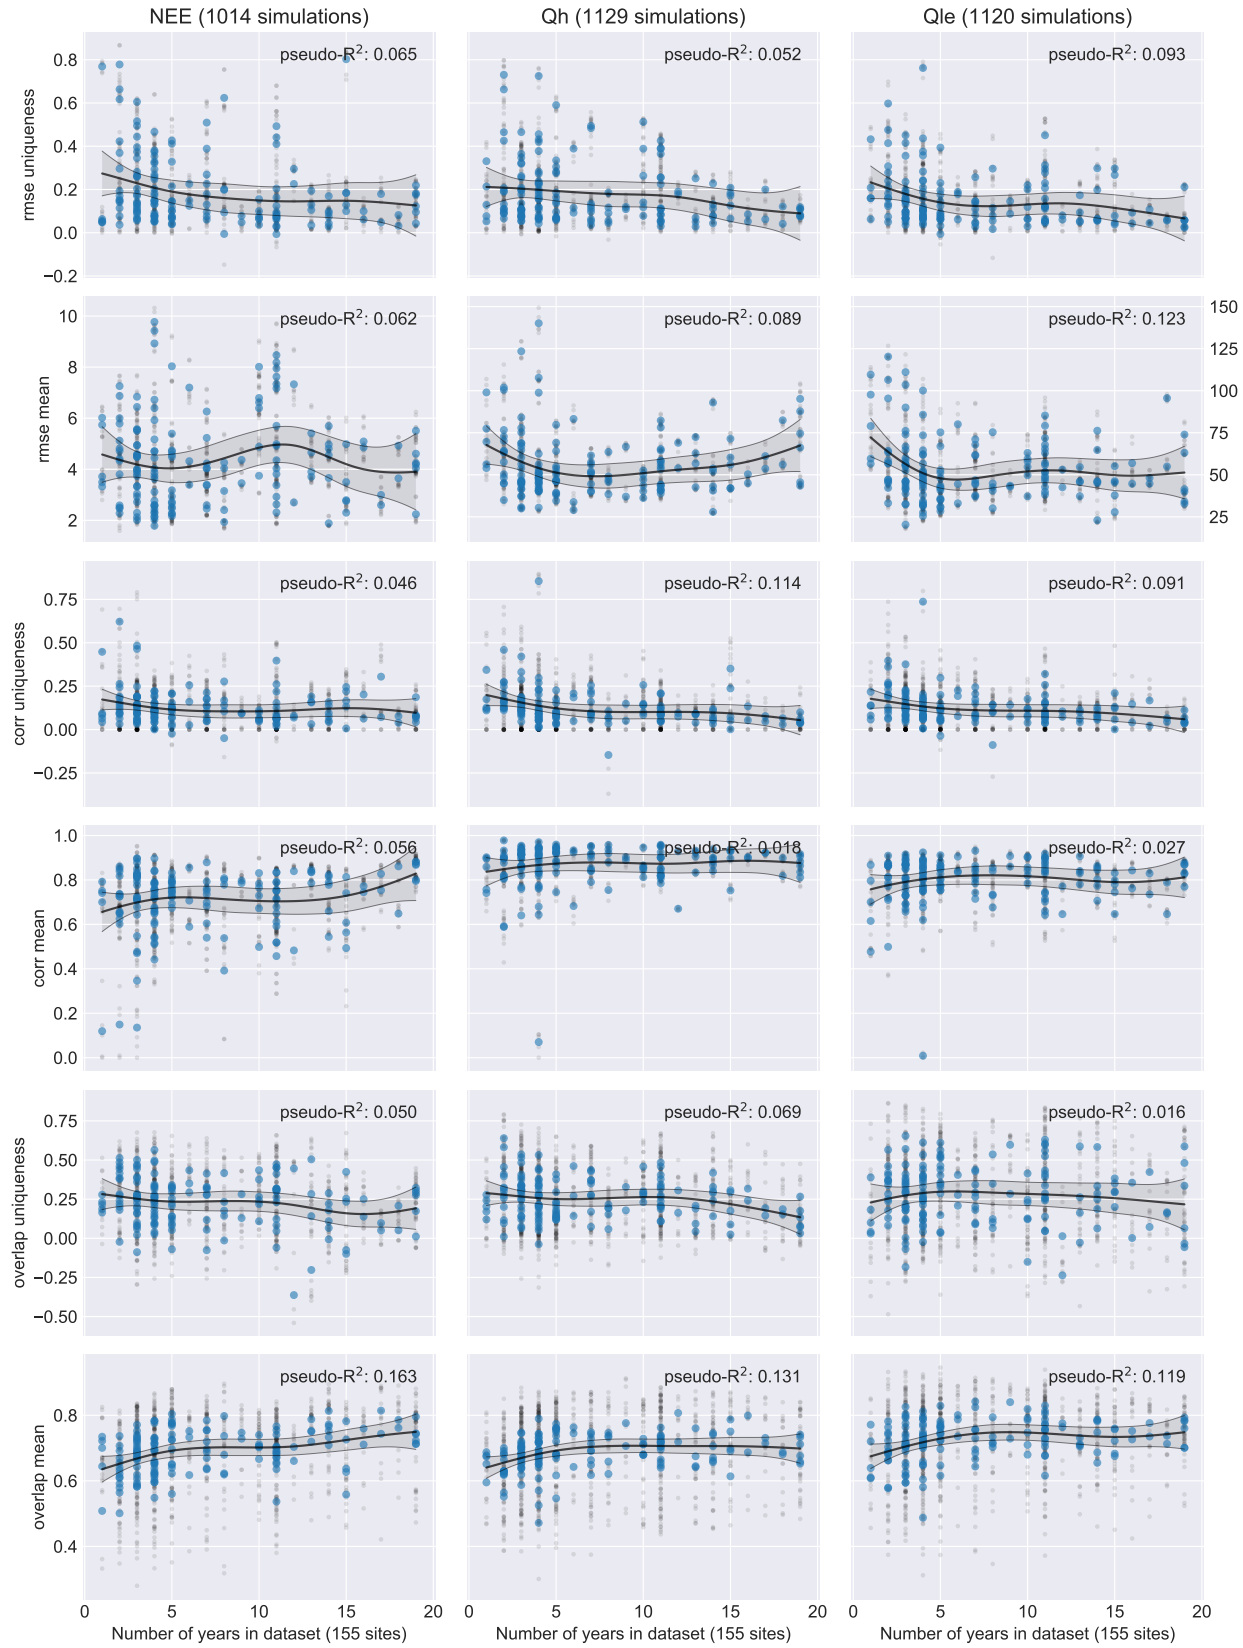

Predictability metrics for number of years in dataset.

Sites, vegetation types, locations and studied periods of flux sites used in this analysis. All data originally from [www.fluxdata.org](http://www.fluxdata.org), via [https://github.com/trevorkeenon/FLUXNET\\_citations](https://github.com/trevorkeenon/FLUXNET_citations). Vegetation types: deciduous broadleaf forest (DBF); evergreen broadleaf forest (EBF); evergreen needleleaf forest (ENF); grassland (GRA); mixed deciduous and evergreen needleleaf forest (MF); savanna ecosystem (SAV); shrub ecosystem (SHR); wetland (WET).

| Site code | Veg type | Latitude | Longitude | Period    | References                                  |
|-----------|----------|----------|-----------|-----------|---------------------------------------------|
| AR-SLu    | MF       | -33.4648 | -66.4598  | 2009-2011 | (Ulke, Gattinoni, and Posse 2015)           |
| AR-Vir    | ENF      | -28.2395 | -56.1886  | 2009-2012 | (Posse et al. 2016)                         |
| AT-Neu    | GRA      | 47.1167  | 11.3175   | 2002-2012 | (Wohlfahrt et al. 2008)                     |
| AU-Ade    | WSA      | -13.0769 | 131.1178  | 2007-2009 | (J. Beringer, Hacker, et al. 2011)          |
| AU-ASM    | ENF      | -22.2830 | 133.2490  | 2010-2013 | (Cleverly et al. 2013)                      |
| AU-Cpr    | SAV      | -34.0021 | 140.5891  | 2010-2014 | (Meyer, Kondrovà, and Koerber 2015)         |
| AU-Cum    | EBF      | -33.6133 | 150.7225  | 2012-2014 | (J. Beringer, Hutley, McHugh, et al. 2016a) |
| AU-DaP    | GRA      | -14.0633 | 131.3181  | 2007-2013 | (J. Beringer, Hutley, Hacker, et al. 2011a) |
| AU-DaS    | SAV      | -14.1593 | 131.3881  | 2008-2014 | (Hutley et al. 2011)                        |
| AU-Dry    | SAV      | -15.2588 | 132.3706  | 2008-2014 | (Cernusak et al. 2011)                      |
| AU-Emr    | GRA      | -23.8587 | 148.4746  | 2011-2013 | (???)                                       |
| AU-Fog    | WET      | -12.5452 | 131.3072  | 2006-2008 | (Beringer et al. 2013)                      |
| AU-Gin    | WSA      | -31.3764 | 115.7138  | 2011-2014 | (???)                                       |
| AU-GWW    | SAV      | -30.1913 | 120.6541  | 2013-2014 | (???)                                       |
| AU-How    | WSA      | -12.4943 | 131.1523  | 2001-2014 | (Cernusak 2007)                             |
| AU-Lox    | DBF      | -34.4704 | 140.6551  | 2008-2009 | (Stevens et al. 2011)                       |
| AU-RDF    | WSA      | -14.5636 | 132.4776  | 2011-2013 | (Bristow et al. 2016)                       |
| AU-Rig    | GRA      | -36.6499 | 145.5759  | 2011-2014 | (J. Beringer, Hutley, McHugh, et al. 2016b) |
| AU-Rob    | EBF      | -17.1175 | 145.6301  | 2014-2014 | (J. Beringer, Hutley, McHugh, et al. 2016c) |
| AU-Stp    | GRA      | -17.1507 | 133.3502  | 2008-2014 | (J. Beringer, Hutley, Hacker, et al. 2011b) |
| AU-TTE    | OSH      | -22.2870 | 133.6400  | 2012-2013 | (???)                                       |
| AU-Tum    | EBF      | -35.6566 | 148.1517  | 2001-2014 | (Leuning et al. 2005)                       |
| AU-Wac    | EBF      | -37.4259 | 145.1878  | 2005-2008 | (Kilinc et al. 2013)                        |
| AU-Whr    | EBF      | -36.6732 | 145.0294  | 2011-2014 | (McHugh et al. 2017)                        |
| AU-Wom    | EBF      | -37.4222 | 144.0944  | 2010-2012 | (???)                                       |
| AU-Ync    | GRA      | -34.9893 | 146.2907  | 2012-2014 | (Yee et al. 2015)                           |
| BE-Bra    | MF       | 51.3092  | 4.5206    | 1996-2014 | (Carrara et al. 2004)                       |
| BE-Lon    | CRO      | 50.5516  | 4.7461    | 2004-2014 | (Moureaux et al. 2006)                      |
| BE-Vie    | MF       | 50.3051  | 5.9981    | 1996-2014 | (Aubinet et al. 2001)                       |
| BR-Sa3    | EBF      | -3.0180  | -54.9714  | 2000-2004 | (Wick et al. 2005)                          |
| CA-Man    | ENF      | 55.8796  | -98.4808  | 1994-2008 | (Dunn et al. 2007)                          |
| CA-NS1    | ENF      | 55.8792  | -98.4839  | 2001-2005 | (Goulden et al. 2006a)                      |
| CA-NS2    | ENF      | 55.9058  | -98.5247  | 2001-2005 | (Goulden et al. 2006b)                      |
| CA-NS3    | ENF      | 55.9117  | -98.3822  | 2001-2005 | (Goulden et al. 2006c)                      |
| CA-NS4    | ENF      | 55.9144  | -98.3806  | 2002-2005 | (Goulden et al. 2006d)                      |
| CA-NS5    | ENF      | 55.8631  | -98.4850  | 2001-2005 | (Goulden et al. 2006e)                      |
| CA-NS6    | OSH      | 55.9167  | -98.9644  | 2001-2005 | (Goulden et al. 2006f)                      |
| CA-NS7    | OSH      | 56.6358  | -99.9483  | 2002-2005 | (Goulden et al. 2006g)                      |
| CA-Qfo    | ENF      | 49.6925  | -74.3421  | 2003-2010 | (Bergeron et al. 2007)                      |
| CA-SF1    | ENF      | 54.4850  | -105.8176 | 2003-2006 | (Mkhabela et al. 2009a)                     |
| CA-SF2    | ENF      | 54.2539  | -105.8775 | 2001-2005 | (Mkhabela et al. 2009b)                     |
| CA-SF3    | OSH      | 54.0916  | -106.0053 | 2001-2006 | (Mkhabela et al. 2009c)                     |
| CH-Cha    | GRA      | 47.2102  | 8.4104    | 2005-2014 | (Merbold et al. 2014)                       |

| Site code | Veg type | Latitude | Longitude | Period    | References                                |
|-----------|----------|----------|-----------|-----------|-------------------------------------------|
| CH-Dav    | ENF      | 46.8153  | 9.8559    | 1997-2014 | (Zielis et al. 2014)                      |
| CH-Fru    | GRA      | 47.1158  | 8.5378    | 2005-2014 | (Imer et al. 2013)                        |
| CH-Lae    | MF       | 47.4781  | 8.3650    | 2004-2014 | (Etzold et al. 2011)                      |
| CH-Oe1    | GRA      | 47.2858  | 7.7319    | 2002-2008 | (Ammann et al. 2009)                      |
| CH-Oe2    | CRO      | 47.2863  | 7.7343    | 2004-2014 | (Dietiker, Buchmann, and Eugster 2010)    |
| CN-Cha    | MF       | 42.4025  | 128.0958  | 2003-2005 | (Guan et al. 2006)                        |
| CN-Cng    | GRA      | 44.5934  | 123.5092  | 2007-2010 | (???)                                     |
| CN-Dan    | GRA      | 30.4978  | 91.0664   | 2004-2005 | (Shi et al. 2006)                         |
| CN-Din    | EBF      | 23.1733  | 112.5361  | 2003-2005 | (???)                                     |
| CN-Du2    | GRA      | 42.0467  | 116.2836  | 2006-2008 | (Chen et al. 2009)                        |
| CN-Ha2    | WET      | 37.6086  | 101.3269  | 2003-2005 | (???)                                     |
| CN-HaM    | GRA      | 37.3700  | 101.1800  | 2002-2004 | (Kato et al. 2006)                        |
| CN-Qia    | ENF      | 26.7414  | 115.0581  | 2003-2005 | (???)                                     |
| CN-Sw2    | GRA      | 41.7902  | 111.8971  | 2010-2012 | (???)                                     |
| CZ-BK1    | ENF      | 49.5021  | 18.5369   | 2004-2008 | (Acosta et al. 2013)                      |
| CZ-BK2    | GRA      | 49.4944  | 18.5429   | 2004-2006 | (???)                                     |
| CZ-wet    | WET      | 49.0247  | 14.7704   | 2006-2014 | (Dušek et al. 2012)                       |
| DE-Akm    | WET      | 53.8662  | 13.6834   | 2009-2014 | (???)                                     |
| DE-Geb    | CRO      | 51.1001  | 10.9143   | 2001-2014 | (Anthoni et al. 2004)                     |
| DE-Gri    | GRA      | 50.9500  | 13.5126   | 2004-2014 | (Prescher, Grünwald, and Bernhofer 2010a) |
| DE-Hai    | DBF      | 51.0792  | 10.4530   | 2000-2012 | (Knohl et al. 2003)                       |
| DE-Kli    | CRO      | 50.8931  | 13.5224   | 2004-2014 | (Prescher, Grünwald, and Bernhofer 2010b) |
| DE-Lkb    | ENF      | 49.0996  | 13.3047   | 2009-2013 | (Lindauer et al. 2014)                    |
| DE-Obe    | ENF      | 50.7867  | 13.7213   | 2008-2014 | (???)                                     |
| DE-RuR    | GRA      | 50.6219  | 6.3041    | 2011-2014 | (Post et al. 2015)                        |
| DE-RuS    | CRO      | 50.8659  | 6.4472    | 2011-2014 | (Mauder et al. 2013)                      |
| DE-Seh    | CRO      | 50.8706  | 6.4497    | 2007-2010 | (Schmidt et al. 2012)                     |
| DE-SfN    | WET      | 47.8064  | 11.3275   | 2012-2014 | (Hommeltenberg et al. 2014)               |
| DE-Spw    | WET      | 51.8923  | 14.0337   | 2010-2014 | (???)                                     |
| DE-Tha    | ENF      | 50.9624  | 13.5652   | 1996-2014 | (Grünwald and Bernhofer 2007)             |
| DK-Fou    | CRO      | 56.4842  | 9.5872    | 2005-2005 | (???)                                     |
| DK-NuF    | WET      | 64.1308  | -51.3861  | 2008-2014 | (Westergaard-Nielsen et al. 2013)         |
| DK-Sor    | DBF      | 55.4859  | 11.6446   | 1996-2014 | (Pilegaard et al. 2011)                   |
| DK-ZaF    | WET      | 74.4814  | -20.5545  | 2008-2011 | (Stiegler et al. 2016)                    |
| DK-ZaH    | GRA      | 74.4732  | -20.5503  | 2000-2014 | (Lund et al. 2012)                        |
| ES-LgS    | OSH      | 37.0979  | -2.9658   | 2007-2009 | (Reverter et al. 2010)                    |
| ES-Ln2    | OSH      | 36.9695  | -3.4758   | 2009-2009 | (???)                                     |
| FI-Hyy    | ENF      | 61.8474  | 24.2948   | 1996-2014 | (???)                                     |
| FI-Jok    | CRO      | 60.8986  | 23.5135   | 2000-2003 | (Lohila 2004)                             |
| FI-Lom    | WET      | 67.9972  | 24.2092   | 2007-2009 | (???)                                     |
| FI-Sod    | ENF      | 67.3619  | 26.6378   | 2001-2014 | (Thum et al. 2007)                        |
| FR-Fon    | DBF      | 48.4764  | 2.7801    | 2005-2014 | (Delpierre et al. 2015)                   |
| FR-Gri    | CRO      | 48.8442  | 1.9519    | 2004-2013 | (Loubet et al. 2011)                      |
| FR-LBr    | ENF      | 44.7171  | -0.7693   | 1996-2008 | (Berbigier, Bonnefond, and Mellmann 2001) |
| FR-Pue    | EBF      | 43.7414  | 3.5958    | 2000-2014 | (Rambal et al. 2004)                      |
| GF-Guy    | EBF      | 5.2788   | -52.9249  | 2004-2014 | (Bonal et al. 2008)                       |
| IT-BCi    | CRO      | 40.5238  | 14.9574   | 2004-2014 | (Vitale et al. 2015)                      |
| IT-CA1    | DBF      | 42.3804  | 12.0266   | 2011-2014 | (Sabbatini et al. 2016a)                  |
| IT-CA2    | CRO      | 42.3772  | 12.0260   | 2011-2014 | (Sabbatini et al. 2016b)                  |
| IT-CA3    | DBF      | 42.3800  | 12.0222   | 2011-2014 | (Sabbatini et al. 2016c)                  |
| IT-Col    | DBF      | 41.8494  | 13.5881   | 1996-2014 | (Valentini et al. 1996)                   |
| IT-Cp2    | EBF      | 41.7043  | 12.3573   | 2012-2014 | (Fares et al. 2014)                       |

| Site code | Veg type | Latitude | Longitude | Period    | References                                 |
|-----------|----------|----------|-----------|-----------|--------------------------------------------|
| IT-Cpz    | EBF      | 41.7052  | 12.3761   | 1997-2009 | (Garbulsky et al. 2008)                    |
| IT-Isp    | DBF      | 45.8126  | 8.6336    | 2013-2014 | (Ferréa et al. 2012)                       |
| IT-La2    | ENF      | 45.9542  | 11.2853   | 2000-2002 | (B. Marcolla, Pitacco, and Cescatti 2003a) |
| IT-Lav    | ENF      | 45.9562  | 11.2813   | 2003-2014 | (B. Marcolla, Pitacco, and Cescatti 2003b) |
| IT-MBo    | GRA      | 46.0147  | 11.0458   | 2003-2013 | (Marcolla et al. 2011)                     |
| IT-Noe    | CSH      | 40.6061  | 8.1515    | 2004-2014 | (Papale et al. 2014)                       |
| IT-PT1    | DBF      | 45.2009  | 9.0610    | 2002-2004 | (Migliavacca et al. 2009)                  |
| IT-Ren    | ENF      | 46.5869  | 11.4337   | 1998-2013 | (Montagnani et al. 2009)                   |
| IT-Ro1    | DBF      | 42.4081  | 11.9300   | 2000-2008 | (Rey et al. 2002)                          |
| IT-Ro2    | DBF      | 42.3903  | 11.9209   | 2002-2012 | (Tedeschi et al. 2006)                     |
| IT-SR2    | ENF      | 43.7320  | 10.2910   | 2013-2014 | (???)                                      |
| IT-SRo    | ENF      | 43.7279  | 10.2844   | 1999-2012 | (Chiesi et al. 2005)                       |
| IT-Tor    | GRA      | 45.8444  | 7.5781    | 2008-2014 | (Galvagno et al. 2013)                     |
| JP-MBF    | DBF      | 44.3869  | 142.3186  | 2003-2005 | (Matsumoto et al. 2008a)                   |
| JP-SMF    | MF       | 35.2617  | 137.0788  | 2002-2006 | (Matsumoto et al. 2008b)                   |
| NL-Hor    | GRA      | 52.2404  | 5.0713    | 2004-2011 | (Jacobs et al. 2007)                       |
| NL-Loo    | ENF      | 52.1666  | 5.7436    | 1996-2013 | (???)                                      |
| NO-Adv    | WET      | 78.1860  | 15.9230   | 2011-2014 | (???)                                      |
| NO-Blv    | SNO      | 78.9216  | 11.8311   | 2008-2009 | (Lüers et al. 2014)                        |
| RU-Che    | WET      | 68.6130  | 161.3414  | 2002-2005 | (Merbold, Kutsch, et al. 2009)             |
| RU-Cok    | OSH      | 70.8291  | 147.4943  | 2003-2014 | (Molen et al. 2007)                        |
| RU-Fyo    | ENF      | 56.4615  | 32.9221   | 1998-2014 | (Kurbatova et al. 2008)                    |
| RU-Ha1    | GRA      | 54.7252  | 90.0022   | 2002-2004 | (Marchesini et al. 2007)                   |
| SD-Dem    | SAV      | 13.2829  | 30.4783   | 2005-2009 | (Ardo et al. 2008)                         |
| SN-Dhr    | SAV      | 15.4028  | -15.4322  | 2010-2013 | (Tagesson et al. 2014)                     |
| US-AR1    | GRA      | 36.4267  | -99.4200  | 2009-2012 | (Raz-Yaseef et al. 2015a)                  |
| US-AR2    | GRA      | 36.6358  | -99.5975  | 2009-2012 | (Raz-Yaseef et al. 2015b)                  |
| US-ARb    | GRA      | 35.5497  | -98.0402  | 2005-2006 | (Raz-Yaseef et al. 2015c)                  |
| US-ARc    | GRA      | 35.5465  | -98.0400  | 2005-2006 | (Raz-Yaseef et al. 2015d)                  |
| US-ARM    | CRO      | 36.6058  | -97.4888  | 2003-2012 | (Fischer et al. 2007)                      |
| US-Blo    | ENF      | 38.8953  | -120.6328 | 1997-2007 | (Goldstein et al. 2000)                    |
| US-Cop    | GRA      | 38.0900  | -109.3900 | 2001-2007 | (Bowling et al. 2010)                      |
| US-GBT    | ENF      | 41.3658  | -106.2397 | 1999-2006 | (Zeller and Nikolov 2000)                  |
| US-GLE    | ENF      | 41.3665  | -106.2399 | 2004-2014 | (Frank et al. 2014)                        |
| US-Ha1    | DBF      | 42.5378  | -72.1715  | 1991-2012 | (Urbanski et al. 2007)                     |
| US-KS2    | CSH      | 28.6086  | -80.6715  | 2003-2006 | (Powell et al. 2006)                       |
| US-Los    | WET      | 46.0827  | -89.9792  | 2000-2014 | (Sulman et al. 2009)                       |
| US-Me1    | ENF      | 44.5794  | -121.5000 | 2004-2005 | (Irvine, Law, and Hibbard 2007)            |
| US-Me2    | ENF      | 44.4523  | -121.5574 | 2002-2014 | (Irvine et al. 2008)                       |
| US-Me6    | ENF      | 44.3233  | -121.6078 | 2010-2014 | (Ruehr, Martin, and Law 2012)              |
| US-MMS    | DBF      | 39.3232  | -86.4131  | 1999-2014 | (Dragoni et al. 2011)                      |
| US-Myb    | WET      | 38.0498  | -121.7651 | 2010-2014 | (Matthes et al. 2014)                      |
| US-Ne1    | CRO      | 41.1651  | -96.4766  | 2001-2013 | (Verma et al. 2005a)                       |
| US-Ne2    | CRO      | 41.1649  | -96.4701  | 2001-2013 | (Verma et al. 2005b)                       |
| US-Ne3    | CRO      | 41.1797  | -96.4397  | 2001-2013 | (Verma et al. 2005c)                       |
| US-NR1    | ENF      | 40.0329  | -105.5464 | 1998-2014 | (Monson et al. 2002)                       |
| US-ORv    | WET      | 40.0201  | -83.0183  | 2011-2011 | (Morin et al. 2014)                        |
| US-PFa    | MF       | 45.9459  | -90.2723  | 1995-2014 | (Desai et al. 2015)                        |
| US-Prr    | ENF      | 65.1237  | -147.4876 | 2010-2013 | (Nakai et al. 2013)                        |
| US-SRG    | GRA      | 31.7894  | -110.8277 | 2008-2014 | (Scott et al. 2015a)                       |
| US-SRM    | WSA      | 31.8214  | -110.8661 | 2004-2014 | (Scott et al. 2009)                        |
| US-Syv    | MF       | 46.2420  | -89.3477  | 2001-2014 | (Desai et al. 2005)                        |



| Site code | Veg type | Latitude | Longitude | Period    | References                                     |
|-----------|----------|----------|-----------|-----------|------------------------------------------------|
| US-Ton    | WSA      | 38.4316  | -120.9660 | 2001-2014 | (Baldocchi et al. 2010)                        |
| US-Tw1    | WET      | 38.1074  | -121.6469 | 2012-2014 | (Oikawa et al. 2017)                           |
| US-Tw2    | CRO      | 38.1047  | -121.6433 | 2012-2013 | (Knox et al. 2016)                             |
| US-Tw3    | CRO      | 38.1159  | -121.6467 | 2013-2014 | (Baldocchi, Sturtevant, and Contributors 2015) |
| US-Tw4    | WET      | 38.1030  | -121.6414 | 2013-2014 | (Baldocchi 2016)                               |
| US-Twt    | CRO      | 38.1087  | -121.6530 | 2009-2014 | (Hatala et al. 2012)                           |
| US-UMB    | DBF      | 45.5598  | -84.7138  | 2000-2014 | (Gough et al. 2013a)                           |
| US-UMd    | DBF      | 45.5625  | -84.6975  | 2007-2014 | (Gough et al. 2013b)                           |
| US-Var    | GRA      | 38.4133  | -120.9507 | 2000-2014 | (Ma et al. 2007)                               |
| US-WCr    | DBF      | 45.8059  | -90.0799  | 1999-2014 | (Cook et al. 2004)                             |
| US-Whs    | OSH      | 31.7438  | -110.0522 | 2007-2014 | (Scott et al. 2015b)                           |
| US-Wi0    | ENF      | 46.6188  | -91.0814  | 2002-2002 | (Noormets, Chen, and Crow 2007a)               |
| US-Wi3    | DBF      | 46.6347  | -91.0987  | 2002-2004 | (Noormets, Chen, and Crow 2007b)               |
| US-Wi4    | ENF      | 46.7393  | -91.1663  | 2002-2005 | (Noormets, Chen, and Crow 2007c)               |
| US-Wi6    | OSH      | 46.6249  | -91.2982  | 2002-2003 | (Noormets, Chen, and Crow 2007d)               |
| US-Wi9    | ENF      | 46.6188  | -91.0814  | 2004-2005 | (Noormets, Chen, and Crow 2007e)               |
| US-Wkg    | GRA      | 31.7365  | -109.9419 | 2004-2014 | (Scott et al. 2010)                            |
| ZA-Kru    | SAV      | -25.0197 | 31.4969   | 2000-2010 | (Archibald et al. 2009)                        |
| ZM-Mon    | DBF      | -15.4378 | 23.2528   | 2000-2009 | (Merbold, Ardö, et al. 2009)                   |

- 37 Acosta, Manuel, Marian Pavelka, Leonardo Montagnani, Werner Kutsch, Anders Lindroth, Radosław Juszczak,  
38 and Dalibor Janouš. 2013. “Soil Surface CO<sub>2</sub> Efflux Measurements in Norway Spruce Forests: Comparison  
39 Between Four Different Sites Across Europe from Boreal to Alpine Forest.” *Geoderma* 192 (January). Elsevier  
40 BV: 295–303. doi:10.1016/j.geoderma.2012.08.027.
- 41 Ammann, Christof, Christoph Spirig, Jens Leifeld, and Albrecht Neftel. 2009. “Assessment of the Nitrogen  
42 and Carbon Budget of Two Managed Temperate Grassland Fields.” *Agriculture, Ecosystems & Environment*  
43 133 (3-4). Elsevier BV: 150–62. doi:10.1016/j.agee.2009.05.006.
- 44 Anthoni, P. M., A. Knohl, C. Rebmann, A. Freibauer, M. Mund, W. Ziegler, O. Kolle, and E.-D. Schulze.  
45 2004. “Forest and Agricultural Land-Use-Dependent CO<sub>2</sub> Exchange in Thuringia, Germany.” *Global Change*  
46 *Biology* 10 (12). Wiley-Blackwell: 2005–19. doi:10.1111/j.1365-2486.2004.00863.x.
- 47 Archibald, S. A., A. Kirton, M. R. van der Merwe, R. J. Scholes, C. A. Williams, and N. Hanan. 2009.  
48 “Drivers of Inter-Annual Variability in Net Ecosystem Exchange in a Semi-Arid Savanna Ecosystem, South  
49 Africa.” *Biogeosciences* 6 (2). Copernicus GmbH: 251–66. doi:10.5194/bg-6-251-2009.
- 50 Ardo, Jonas, Meelis Molder, Bashir A El-Tahir, and Hatim A M Elkhidir. 2008. “Seasonal Variation of  
51 Carbon Fluxes in a Sparse Savanna in Semi Arid Sudan.” *Carbon Balance and Management* 3 (1). Springer  
52 Nature: 7. doi:10.1186/1750-0680-3-7.
- 53 Aubinet, M, B Chermanne, M Vandenhaute, B Longdoz, M Yernaux, and E Laitat. 2001. “Long Term Carbon  
54 Dioxide Exchange Above a Mixed Forest in the Belgian Ardennes.” *Agricultural and Forest Meteorology* 108  
55 (4). Elsevier BV: 293–315. doi:10.1016/s0168-1923(01)00244-1.
- 56 Baldocchi, Dennis. 2016. “AmeriFlux US-Tw4 Twitchell East End Wetland from 2013-Present.”  
57 doi:10.17190/AMF/1246151.
- 58 Baldocchi, Dennis, Qi Chen, Xingyuan Chen, Siyan Ma, Gretchen Miller, Youngryel Ryu, Jingfeng Xiao,  
59 Rebecca Wenk, and John Battles. 2010. “The Dynamics of Energy, Water, and Carbon Fluxes in a Blue  
60 Oak (*Quercus Douglasii*) Savanna in California.” In *Ecosystem Function in Savannas*, 135–51. CRC Press.  
61 doi:10.1201/b10275-10.
- 62 Baldocchi, Dennis, Cove Sturtevant, and Fluxnet Contributors. 2015. “Does Day and Night Sampling Reduce  
63 Spurious Correlation Between Canopy Photosynthesis and Ecosystem Respiration?” *Agricultural and Forest*

- 64 *Meteorology* 207 (July). Elsevier BV: 117–26. doi:10.1016/j.agrformet.2015.03.010.
- 65 Berbigier, Paul, Jean-Marc Bonnefond, and Patricia Mellmann. 2001. “CO<sub>2</sub> and Water Vapour Fluxes for  
66 2 Years Above Euroflux Forest Site.” *Agricultural and Forest Meteorology* 108 (3). Elsevier BV: 183–97.  
67 doi:10.1016/s0168-1923(01)00240-4.
- 68 Bergeron, Onil, Hank A. Margolis, T. Andrew Black, Carole Coursolle, Allison L. Dunn, Alan G. Barr, and  
69 Steven C. Wofsy. 2007. “Comparison of Carbon Dioxide Fluxes over Three Boreal Black Spruce Forests in  
70 Canada.” *Global Change Biology* 13 (1). Wiley-Blackwell: 89–107. doi:10.1111/j.1365-2486.2006.01281.x.
- 71 Beringer, Jason, Jorg Hacker, Lindsay B. Hutley, Ray Leuning, Stefan K. Arndt, Reza Amiri, Lutz  
72 Bannehr, et al. 2011. “SPECIALSavanna Patterns of Energy and Carbon Integrated Across the Land-  
73 scape.” *Bulletin of the American Meteorological Society* 92 (11). American Meteorological Society: 1467–85.  
74 doi:10.1175/2011bams2948.1.
- 75 Beringer, Jason, Lindsay B. Hutley, Jorg M. Hacker, Bruno Neininger, and Kyaw Tha Paw U. 2011a.  
76 “Patterns and Processes of Carbon, Water and Energy Cycles Across Northern Australian Land-  
77 scapes: From Point to Region.” *Agricultural and Forest Meteorology* 151 (11). Elsevier BV: 1409–16.  
78 doi:10.1016/j.agrformet.2011.05.003.
- 79 ———. 2011b. “Patterns and Processes of Carbon, Water and Energy Cycles Across Northern Australian  
80 Landscapes: From Point to Region.” *Agricultural and Forest Meteorology* 151 (11). Elsevier BV: 1409–16.  
81 doi:10.1016/j.agrformet.2011.05.003.
- 82 Beringer, Jason, Lindsay B. Hutley, Ian McHugh, Stefan K. Arndt, David Campbell, Helen A. Cleugh, James  
83 Cleverly, et al. 2016a. “An Introduction to the Australian and New Zealand Flux Tower Network OzFlux.”  
84 *Biogeosciences* 13 (21). Copernicus GmbH: 5895–5916. doi:10.5194/bg-13-5895-2016.
- 85 ———. 2016b. “An Introduction to the Australian and New Zealand Flux Tower Network OzFlux.” *Biogeo-*  
86 *sciences* 13 (21). Copernicus GmbH: 5895–5916. doi:10.5194/bg-13-5895-2016.
- 87 ———. 2016c. “An Introduction to the Australian and New Zealand Flux Tower Network OzFlux.” *Biogeo-*  
88 *sciences* 13 (21). Copernicus GmbH: 5895–5916. doi:10.5194/bg-13-5895-2016.
- 89 Beringer, Jason, Stephen J. Livesley, Jennifer Randle, and Lindsay B. Hutley. 2013. “Carbon Diox-  
90 ide Fluxes Dominate the Greenhouse Gas Exchanges of a Seasonal Wetland in the Wetdry Tropics of  
91 Northern Australia.” *Agricultural and Forest Meteorology* 182–183 (December). Elsevier BV: 239–47.  
92 doi:10.1016/j.agrformet.2013.06.008.
- 93 Bonal, Damien, Alexandre Bosc, Stéphane Ponton, Jean-Yves Goret, Benoît Burban, Patrick Gross, Jean-Marc  
94 Bonnefond, et al. 2008. “Impact of Severe Dry Season on Net Ecosystem Exchange in the Neotropical  
95 Rainforest of French Guiana.” *Global Change Biology* 14 (8). Wiley-Blackwell: 1917–33. doi:10.1111/j.1365-  
96 2486.2008.01610.x.
- 97 Bowling, D. R., S. Bethers-Marchetti, C. K. Lunch, E. E. Grote, and J. Belnap. 2010. “Carbon, Water, and  
98 Energy Fluxes in a Semiarid Cold Desert Grassland During and Following Multiyear Drought.” *Journal of*  
99 *Geophysical Research* 115 (G4). Wiley-Blackwell. doi:10.1029/2010jg001322.
- 100 Bristow, M., L. B. Hutley, J. Beringer, S. J. Livesley, A. C. Edwards, and S. K. Arndt. 2016. “Quantifying the  
101 Relative Importance of Greenhouse Gas Emissions from Current and Future Savanna Land Use Change Across  
102 Northern Australia.” *Biogeosciences Discussions*, May. Copernicus GmbH, 1–47. doi:10.5194/bg-2016-191.
- 103 Carrara, Arnaud, Ivan A. Janssens, Jorge Curiel Yuste, and Reinhart Ceulemans. 2004. “Seasonal Changes in  
104 Photosynthesis, Respiration and NEE of a Mixed Temperate Forest.” *Agricultural and Forest Meteorology* 126  
105 (1–2). Elsevier BV: 15–31. doi:10.1016/j.agrformet.2004.05.002.
- 106 Cernusak, Jason Beringer And Lindsay B. Hutley And Nigel J. Tapper And Lucas A. 2007. “Savanna  
107 Fires and Their Impact on Net Ecosystem Productivity in North Australia.” *Global Change Biology* 13 (5).  
108 Wiley-Blackwell: 990–1004. doi:10.1111/j.1365-2486.2007.01334.x.
- 109 Cernusak, Lucas A., Lindsay B. Hutley, Jason Beringer, Joseph A.M. Holtum, and Benjamin L. Turner. 2011.  
110 “Photosynthetic Physiology of Eucalypts Along a Sub-Continental Rainfall Gradient in Northern Australia.”

- 111 *Agricultural and Forest Meteorology* 151 (11). Elsevier BV: 1462–70. doi:10.1016/j.agrformet.2011.01.006.
- 112 Chen, Shiping, Jiquan Chen, Guanghui Lin, Wenli Zhang, Haixia Miao, Long Wei, Jianhui Huang,  
113 and Xingguo Han. 2009. “Energy Balance and Partition in Inner Mongolia Steppe Ecosystems with  
114 Different Land Use Types.” *Agricultural and Forest Meteorology* 149 (11). Elsevier BV: 1800–1809.  
115 doi:10.1016/j.agrformet.2009.06.009.
- 116 Chiesi, M., F. Maselli, M. Bindi, L. Fibbi, P. Cherubini, E. Arlotta, G. Tirone, G. Matteucci, and G. Seufert.  
117 2005. “Modelling Carbon Budget of Mediterranean Forests Using Ground and Remote Sensing Measurements.”  
118 *Agricultural and Forest Meteorology* 135 (1-4). Elsevier BV: 22–34. doi:10.1016/j.agrformet.2005.09.011.
- 119 Cleverly, James, Nicolas Boulain, Randol Villalobos-Vega, Nicole Grant, Ralph Faux, Cameron Wood, Peter  
120 G. Cook, Qiang Yu, Andrea Leigh, and Derek Eamus. 2013. “Dynamics of Component Carbon Fluxes in  
121 a Semi-arid Acacia woodland, Central Australia.” *Journal of Geophysical Research: Biogeosciences* 118 (3).  
122 Wiley-Blackwell: 1168–85. doi:10.1002/jgrg.20101.
- 123 Cook, Bruce D., Kenneth J. Davis, Weiguo Wang, Ankur Desai, Bradford W. Berger, Ron M. Teclaw,  
124 Jonathan G. Martin, et al. 2004. “Carbon Exchange and Venting Anomalies in an Upland Deciduous  
125 Forest in Northern Wisconsin, USA.” *Agricultural and Forest Meteorology* 126 (3-4). Elsevier BV: 271–95.  
126 doi:10.1016/j.agrformet.2004.06.008.
- 127 Delpierre, Nicolas, Daniel Berveiller, Elena Granda, and Eric Dufrêne. 2015. “Wood Phenology, Not Carbon  
128 Input, Controls the Interannual Variability of Wood Growth in a Temperate Oak Forest.” *New Phytologist*  
129 210 (2). Wiley-Blackwell: 459–70. doi:10.1111/nph.13771.
- 130 Desai, Ankur R., Paul V. Bolstad, Bruce D. Cook, Kenneth J. Davis, and Eileen V. Carey. 2005. “Comparing  
131 Net Ecosystem Exchange of Carbon Dioxide Between an Old-Growth and Mature Forest in the Upper Midwest,  
132 USA.” *Agricultural and Forest Meteorology* 128 (1-2). Elsevier BV: 33–55. doi:10.1016/j.agrformet.2004.09.005.
- 133 Desai, Ankur R., Ke Xu, Hanqin Tian, Peter Weishampel, Jonathan Thom, Dan Baumann, Arlyn E. Andrews,  
134 Bruce D. Cook, Jennifer Y. King, and Randall Kolka. 2015. “Landscape-Level Terrestrial Methane Flux  
135 Observed from a Very Tall Tower.” *Agricultural and Forest Meteorology* 201 (February). Elsevier BV: 61–75.  
136 doi:10.1016/j.agrformet.2014.10.017.
- 137 Dietiker, Dominique, Nina Buchmann, and Werner Eugster. 2010. “Testing the Ability of the DNDC Model  
138 to Predict CO<sub>2</sub> and Water Vapour Fluxes of a Swiss Cropland Site.” *Agriculture, Ecosystems & Environment*  
139 139 (3). Elsevier BV: 396–401. doi:10.1016/j.agee.2010.09.002.
- 140 Dragoni, Danilo, Hans Peter Schmid, Craig A. Wayson, Henry Potter, C. Susan B. Grimmond, and James C.  
141 Randolph. 2011. “Evidence of Increased Net Ecosystem Productivity Associated with a Longer Vegetated  
142 Season in a Deciduous Forest in South-Central Indiana, USA.” *Global Change Biology* 17 (2). Wiley-Blackwell:  
143 886–97. doi:10.1111/j.1365-2486.2010.02281.x.
- 144 Dunn, Allison L., Carol C. Barford, Steven C. Wofsy, Michael L. Goulden, and Bruce C. Daube. 2007. “A  
145 Long-Term Record of Carbon Exchange in a Boreal Black Spruce Forest: Means, Responses to Interannual  
146 Variability, and Decadal Trends.” *Global Change Biology* 13 (3). Wiley-Blackwell: 577–90. doi:10.1111/j.1365-  
147 2486.2006.01221.x.
- 148 Dušek, J., H. Čížková, S. Stellner, R. Czerný, and J. Květ. 2012. “Fluctuating Water Table Affects Gross  
149 Ecosystem Production and Gross Radiation Use Efficiency in a Sedge-Grass Marsh.” *Hydrobiologia* 692 (1).  
150 Springer Nature: 57–66. doi:10.1007/s10750-012-0998-z.
- 151 Etzold, Sophia, Nadine K. Ruehr, Roman Zweifel, Matthias Dobbertin, Andreas Zingg, Peter Pluess, Rudolf  
152 Häsler, Werner Eugster, and Nina Buchmann. 2011. “The Carbon Balance of Two Contrasting Mountain  
153 Forest Ecosystems in Switzerland: Similar Annual Trends, but Seasonal Differences.” *Ecosystems* 14 (8).  
154 Springer Nature: 1289–1309. doi:10.1007/s10021-011-9481-3.
- 155 Fares, S., F. Savi, J. Muller, G. Matteucci, and E. Paoletti. 2014. “Simultaneous Measurements of Above  
156 and Below Canopy Ozone Fluxes Help Partitioning Ozone Deposition Between Its Various Sinks in a

- 157 Mediterranean Oak Forest.” *Agricultural and Forest Meteorology* 198-199 (November). Elsevier BV: 181–91.  
158 doi:10.1016/j.agrformet.2014.08.014.
- 159 Ferréa, Chiara, Terenzio Zenone, Roberto Comolli, and Günther Seufert. 2012. “Estimating Heterotrophic  
160 and Autotrophic Soil Respiration in a Semi-Natural Forest of Lombardy, Italy.” *Pedobiologia* 55 (6). Elsevier  
161 BV: 285–94. doi:10.1016/j.pedobi.2012.05.001.
- 162 Fischer, Marc L., David P. Billesbach, Joseph A. Berry, William J. Riley, and Margaret S. Torn. 2007.  
163 “Spatiotemporal Variations in Growing Season Exchanges of CO<sub>2</sub>, H<sub>2</sub>O, and Sensible Heat in Agricultural  
164 Fields of the Southern Great Plains.” *Earth Interactions* 11 (17). American Meteorological Society: 1–21.  
165 doi:10.1175/ei231.1.
- 166 Frank, John M., William J. Massman, Brent E. Ewers, Laurie S. Huckaby, and José F. Negrón. 2014.  
167 “Ecosystem CO<sub>2</sub>/H<sub>2</sub>O Fluxes Are Explained by Hydraulically Limited Gas Exchange During Tree Mortality  
168 from Spruce Bark Beetles.” *Journal of Geophysical Research: Biogeosciences* 119 (6). Wiley-Blackwell:  
169 1195–1215. doi:10.1002/2013jg002597.
- 170 Galvagno, M, G Wohlfahrt, E Cremonese, M Rossini, R Colombo, G Filippa, T Julitta, et al. 2013. “Phenology  
171 and Carbon Dioxide Source/Sink Strength of a Subalpine Grassland in Response to an Exceptionally Short Snow  
172 Season.” *Environmental Research Letters* 8 (2). IOP Publishing: 025008. doi:10.1088/1748-9326/8/2/025008.
- 173 Garbulsky, Martín F., Josep Peñuelas, Dario Papale, and Iolanda Filella. 2008. “Remote Estimation of  
174 Carbon Dioxide Uptake by a Mediterranean Forest.” *Global Change Biology* 14 (12). Wiley-Blackwell: 2860–7.  
175 doi:10.1111/j.1365-2486.2008.01684.x.
- 176 Goldstein, A.H., N.E. Hultman, J.M. Fracheboud, M.R. Bauer, J.A. Panek, M. Xu, Y. Qi, A.B. Guenther,  
177 and W. Baugh. 2000. “Effects of Climate Variability on the Carbon Dioxide, Water, and Sensible Heat Fluxes  
178 Above a Ponderosa Pine Plantation in the Sierra Nevada (CA).” *Agricultural and Forest Meteorology* 101  
179 (2-3). Elsevier BV: 113–29. doi:10.1016/s0168-1923(99)00168-9.
- 180 Gough, Christopher M., Brady S. Hardiman, Lucas E. Nave, Gil Bohrer, Kyle D. Maurer, Christoph S.  
181 Vogel, Knute J. Nadelhoffer, and Peter S. Curtis. 2013a. “Sustained Carbon Uptake and Storage Following  
182 Moderate Disturbance in a Great Lakes Forest.” *Ecological Applications* 23 (5). Wiley-Blackwell: 1202–15.  
183 doi:10.1890/12-1554.1.
- 184 ———. 2013b. “Sustained Carbon Uptake and Storage Following Moderate Disturbance in a Great Lakes  
185 Forest.” *Ecological Applications* 23 (5). Wiley-Blackwell: 1202–15. doi:10.1890/12-1554.1.
- 186 Goulden, Michael L., Gregory C. Winston, Andrew M. S. McMillan, Marcy E. Litvak, Edward L. Read,  
187 Adrian V. Rocha, and J. Rob Elliot. 2006a. “An Eddy Covariance Mesonet to Measure the Effect of  
188 Forest Age on Land?atmosphere Exchange.” *Global Change Biology* 12 (11). Wiley-Blackwell: 2146–62.  
189 doi:10.1111/j.1365-2486.2006.01251.x.
- 190 ———. 2006b. “An Eddy Covariance Mesonet to Measure the Effect of Forest Age on Land?atmosphere  
191 Exchange.” *Global Change Biology* 12 (11). Wiley-Blackwell: 2146–62. doi:10.1111/j.1365-2486.2006.01251.x.
- 192 ———. 2006c. “An Eddy Covariance Mesonet to Measure the Effect of Forest Age on Land?atmosphere  
193 Exchange.” *Global Change Biology* 12 (11). Wiley-Blackwell: 2146–62. doi:10.1111/j.1365-2486.2006.01251.x.
- 194 ———. 2006d. “An Eddy Covariance Mesonet to Measure the Effect of Forest Age on Land?atmosphere  
195 Exchange.” *Global Change Biology* 12 (11). Wiley-Blackwell: 2146–62. doi:10.1111/j.1365-2486.2006.01251.x.
- 196 ———. 2006e. “An Eddy Covariance Mesonet to Measure the Effect of Forest Age on Land?atmosphere  
197 Exchange.” *Global Change Biology* 12 (11). Wiley-Blackwell: 2146–62. doi:10.1111/j.1365-2486.2006.01251.x.
- 198 ———. 2006f. “An Eddy Covariance Mesonet to Measure the Effect of Forest Age on Land?atmosphere  
199 Exchange.” *Global Change Biology* 12 (11). Wiley-Blackwell: 2146–62. doi:10.1111/j.1365-2486.2006.01251.x.
- 200 ———. 2006g. “An Eddy Covariance Mesonet to Measure the Effect of Forest Age on Land?atmosphere  
201 Exchange.” *Global Change Biology* 12 (11). Wiley-Blackwell: 2146–62. doi:10.1111/j.1365-2486.2006.01251.x.
- 202 Grünwald, Thomas, and Christian Bernhofer. 2007. “A Decade of Carbon, Water and Energy Flux

- 203 Measurements of an Old Spruce Forest at the Anchor Station Tharandt.” *Tellus B* 59 (3). Informa UK  
204 Limited. doi:10.3402/tellusb.v59i3.17000.
- 205 Guan, De-Xin, Jia-Bing Wu, Xiao-Song Zhao, Shi-Jie Han, Gui-Rui Yu, Xiao-Min Sun, and Chang-Jie Jin.  
206 2006. “CO<sub>2</sub> Fluxes over an Old, Temperate Mixed Forest in Northeastern China.” *Agricultural and Forest*  
207 *Meteorology* 137 (3-4). Elsevier BV: 138–49. doi:10.1016/j.agrformet.2006.02.003.
- 208 Hatala, Jaclyn A., Matteo Detto, Oliver Sonnentag, Steven J. Deverel, Joseph Verfaillie, and Dennis D.  
209 Baldocchi. 2012. “Greenhouse Gas (CO<sub>2</sub>, CH<sub>4</sub>, H<sub>2</sub>O) Fluxes from Drained and Flooded Agricultural Peatlands  
210 in the Sacramento-San Joaquin Delta.” *Agriculture, Ecosystems & Environment* 150 (March). Elsevier BV:  
211 1–18. doi:10.1016/j.agee.2012.01.009.
- 212 Hommeltenberg, J., H. P. Schmid, M. Drösler, and P. Werle. 2014. “Can a Bog Drained for Forestry Be a  
213 Stronger Carbon Sink Than a Natural Bog Forest?” *Biogeosciences* 11 (13). Copernicus GmbH: 3477–93.  
214 doi:10.5194/bg-11-3477-2014.
- 215 Hutley, Lindsay B., Jason Beringer, Peter R. Isaac, Jorg M. Hacker, and Lucas A. Cernusak. 2011.  
216 “A Sub-Continental Scale Living Laboratory: Spatial Patterns of Savanna Vegetation over a Rainfall  
217 Gradient in Northern Australia.” *Agricultural and Forest Meteorology* 151 (11). Elsevier BV: 1417–28.  
218 doi:10.1016/j.agrformet.2011.03.002.
- 219 Imer, D., L. Merbold, W. Eugster, and N. Buchmann. 2013. “Temporal and Spatial Variations of Soil CO<sub>2</sub>,  
220 CH<sub>4</sub> and N<sub>2</sub>O Fluxes at Three Differently Managed Grasslands.” *Biogeosciences* 10 (9). Copernicus GmbH:  
221 5931–45. doi:10.5194/bg-10-5931-2013.
- 222 Irvine, J., B. E. Law, and K. A. Hibbard. 2007. “Postfire Carbon Pools and Fluxes in Semiarid Ponderosa  
223 Pine in Central Oregon.” *Global Change Biology* 13 (8). Wiley-Blackwell: 1748–60. doi:10.1111/j.1365-  
224 2486.2007.01368.x.
- 225 Irvine, J., B. E. Law, J. G. Martin, and D. Vickers. 2008. “Interannual Variation in Soil CO<sub>2</sub>efflux and the  
226 Response of Root Respiration to Climate and Canopy Gas Exchange in Mature Ponderosa Pine.” *Global*  
227 *Change Biology* 14 (12). Wiley-Blackwell: 2848–59. doi:10.1111/j.1365-2486.2008.01682.x.
- 228 Jacobs, C. M. J., A. F. G. Jacobs, F. C. Bosveld, D. M. D. Hendriks, A. Hensen, P. S. Kroon, E. J. Moors,  
229 L. Nol, A. Schrier-Uijl, and E. M. Veenendaal. 2007. “Variability of Annual CO<sub>2</sub> Exchange from Dutch  
230 Grasslands.” *Biogeosciences* 4 (5). Copernicus GmbH: 803–16. doi:10.5194/bg-4-803-2007.
- 231 Kato, Tomomichi, Yanhong Tang, Song Gu, Mitsuru Hirota, Mingyuan Du, Yingnian Li, and Xinquan Zhao.  
232 2006. “Temperature and Biomass Influences on Interannual Changes in CO<sub>2</sub> Exchange in an Alpine Meadow on  
233 the Qinghai-Tibetan Plateau.” *Global Change Biology* 12 (7). Wiley-Blackwell: 1285–98. doi:10.1111/j.1365-  
234 2486.2006.01153.x.
- 235 Kilinc, Musa, Jason Beringer, Lindsay B. Hutley, Nigel J. Tapper, and David A. McGuire. 2013. “Carbon  
236 and Water Exchange of the Worlds Tallest Angiosperm Forest.” *Agricultural and Forest Meteorology* 182-183  
237 (December). Elsevier BV: 215–24. doi:10.1016/j.agrformet.2013.07.003.
- 238 Knohl, Alexander, Ernst-Detlef Schulze, Olaf Kolle, and Nina Buchmann. 2003. “Large Carbon Uptake by an  
239 Unmanaged 250-Year-Old Deciduous Forest in Central Germany.” *Agricultural and Forest Meteorology* 118  
240 (3-4). Elsevier BV: 151–67. doi:10.1016/s0168-1923(03)00115-1.
- 241 Knox, Sara Helen, Jaclyn Hatala Matthes, Cove Sturtevant, Patricia Y. Oikawa, Joseph Verfaillie, and Dennis  
242 Baldocchi. 2016. “Biophysical Controls on Interannual Variability in Ecosystem-Scale CO<sub>2</sub>and CH<sub>4</sub>exchange  
243 in a California Rice Paddy.” *Journal of Geophysical Research: Biogeosciences* 121 (3). Wiley-Blackwell:  
244 978–1001. doi:10.1002/2015jg003247.
- 245 Kurbatova, J., C. Li, A. Varlagin, X. Xiao, and N. Vygodskaya. 2008. “Modeling Carbon Dynamics in Two  
246 Adjacent Spruce Forests with Different Soil Conditions in Russia.” *Biogeosciences* 5 (4). Copernicus GmbH:  
247 969–80. doi:10.5194/bg-5-969-2008.
- 248 Leuning, Ray, Helen A. Cleugh, Steven J. Zieglin, and Dale Hughes. 2005. “Carbon and Water Fluxes over a  
249 Temperate Eucalyptus Forest and a Tropical Wet/Dry Savanna in Australia: Measurements and Comparison

- 250 with MODIS Remote Sensing Estimates.” *Agricultural and Forest Meteorology* 129 (3-4). Elsevier BV: 151–73.  
251 doi:10.1016/j.agrformet.2004.12.004.
- 252 Lindauer, M., H.P. Schmid, R. Grote, M. Mauder, R. Steinbrecher, and B. Wolpert. 2014. “Net Ecosystem  
253 Exchange over a Non-Cleared Wind-Throw-Disturbed Upland Spruce Forest Measurements and Simulations.”  
254 *Agricultural and Forest Meteorology* 197 (October). Elsevier BV: 219–34. doi:10.1016/j.agrformet.2014.07.005.
- 255 Lohila, Annalea. 2004. “Annual CO<sub>2</sub> exchange of a Peat Field Growing Spring Barley or Perennial Forage  
256 Grass.” *Journal of Geophysical Research* 109 (D18). Wiley-Blackwell. doi:10.1029/2004jd004715.
- 257 Loubet, Benjamin, Patricia Laville, Simon Lehuger, Eric Larmanou, Christophe Fléchar, Nicolas Mascher,  
258 Sophie Genermont, et al. 2011. “Carbon, Nitrogen and Greenhouse Gases Budgets over a Four Years Crop  
259 Rotation in Northern France.” *Plant and Soil* 343 (1-2). Springer Nature: 109–37. doi:10.1007/s11104-011-  
260 0751-9.
- 261 Lund, Magnus, Julie M. Falk, Thomas Friborg, Herbert N. Mbufong, Charlotte Sigsgaard, Henrik Soegaard,  
262 and Mikkel P. Tamstorf. 2012. “Trends in CO<sub>2</sub> exchange in a High Arctic Tundra Heath, 2000-2010.” *Journal*  
263 *of Geophysical Research: Biogeosciences* 117 (G2). Wiley-Blackwell: n/a–n/a. doi:10.1029/2011jg001901.
- 264 Lüers, J., S. Westermann, K. Piel, and J. Boike. 2014. “Annual CO<sub>2</sub> Budget and Seasonal CO<sub>2</sub> Exchange  
265 Signals at a High Arctic Permafrost Site on Spitsbergen, Svalbard Archipelago.” *Biogeosciences* 11 (22).  
266 Copernicus GmbH: 6307–22. doi:10.5194/bg-11-6307-2014.
- 267 Ma, Siyan, Dennis D. Baldocchi, Liukang Xu, and Ted Hehn. 2007. “Inter-Annual Variability in Carbon  
268 Dioxide Exchange of an Oak/Grass Savanna and Open Grassland in California.” *Agricultural and Forest*  
269 *Meteorology* 147 (3-4). Elsevier BV: 157–71. doi:10.1016/j.agrformet.2007.07.008.
- 270 Marchesini, L. Belelli, D. Papale, M. Reichstein, N. Vuichard, N. Tchebakova, and R. Valentini. 2007. “Carbon  
271 Balance Assessment of a Natural Steppe of Southern Siberia by Multiple Constraint Approach.” *Biogeosciences*  
272 *Discussions* 4 (1). Copernicus GmbH: 165–208. doi:10.5194/bgd-4-165-2007.
- 273 Marcolla, B., A. Pitacco, and A. Cescatti. 2003a. “Canopy Architecture and Turbulence Structure in a Conif-  
274 erous Forest.” *Boundary-Layer Meteorology* 108 (1). Springer Nature: 39–59. doi:10.1023/a:1023027709805.
- 275 ———. 2003b. “Canopy Architecture and Turbulence Structure in a Coniferous Forest.” *Boundary-Layer*  
276 *Meteorology* 108 (1). Springer Nature: 39–59. doi:10.1023/a:1023027709805.
- 277 Marcolla, Barbara, Alessandro Cescatti, Giovanni Manca, Roberto Zorer, Mauro Cavagna, Alessandro  
278 Fiora, Damiano Gianelle, Mirco Rodeghiero, Matteo Sottocornola, and Roberto Zampedri. 2011. “Cli-  
279 matic Controls and Ecosystem Responses Drive the Inter-Annual Variability of the Net Ecosystem Ex-  
280 change of an Alpine Meadow.” *Agricultural and Forest Meteorology* 151 (9). Elsevier BV: 1233–43.  
281 doi:10.1016/j.agrformet.2011.04.015.
- 282 Matsumoto, Kazuho, Takeshi Ohta, Taro Nakai, Takashi Kuwada, Ken’ichi Daikoku, Shin’ichi Iida, Hi-  
283 ronori Yabuki, et al. 2008a. “Energy Consumption and Evapotranspiration at Several Boreal and Tem-  
284 perate Forests in the Far East.” *Agricultural and Forest Meteorology* 148 (12). Elsevier BV: 1978–89.  
285 doi:10.1016/j.agrformet.2008.09.008.
- 286 ———. 2008b. “Energy Consumption and Evapotranspiration at Several Boreal and Temperate  
287 Forests in the Far East.” *Agricultural and Forest Meteorology* 148 (12). Elsevier BV: 1978–89.  
288 doi:10.1016/j.agrformet.2008.09.008.
- 289 Matthes, Jaclyn Hatala, Cove Sturtevant, Joseph Verfaillie, Sara Knox, and Dennis Baldocchi. 2014. “Parsing  
290 the Variability in CH<sub>4</sub> flux at a Spatially Heterogeneous Wetland: Integrating Multiple Eddy Covariance  
291 Towers with High-Resolution Flux Footprint Analysis.” *Journal of Geophysical Research: Biogeosciences* 119  
292 (7). Wiley-Blackwell: 1322–39. doi:10.1002/2014jg002642.
- 293 Mauder, Matthias, Matthias Cuntz, Clemens Drüe, Alexander Graf, Corinna Rebmann, Hans Peter Schmid,  
294 Marius Schmidt, and Rainer Steinbrecher. 2013. “A Strategy for Quality and Uncertainty Assessment of

- 295 Long-Term Eddy-Covariance Measurements.” *Agricultural and Forest Meteorology* 169 (February). Elsevier  
296 BV: 122–35. doi:10.1016/j.agrformet.2012.09.006.
- 297 McHugh, Ian D., Jason Beringer, Shaun C. Cunningham, Patrick J. Baker, Timothy R. Cavagnaro, Ralph  
298 Mac Nally, and Ross M. Thompson. 2017. “Interactions Between Nocturnal Turbulent Flux, Storage and  
299 Advection at an Ideal Eucalypt Woodland Site.” *Biogeosciences* 14 (12). Copernicus GmbH: 3027–50.  
300 doi:10.5194/bg-14-3027-2017.
- 301 Merbold, L., J. Ardö, A. Arneth, R. J. Scholes, Y. Nouvellon, A. de Grandcourt, S. Archibald, et al. 2009.  
302 “Precipitation as Driver of Carbon Fluxes in 11 African Ecosystems.” *Biogeosciences* 6 (6). Copernicus GmbH:  
303 1027–41. doi:10.5194/bg-6-1027-2009.
- 304 Merbold, L., W. L. Kutsch, C. Corradi, O. Kolle, C. Rebmann, P. C. Stoy, S. A. Zimov, and E.-D. Schulze.  
305 2009. “Artificial Drainage and Associated Carbon Fluxes (CO<sub>2</sub>/CH<sub>4</sub>) in a Tundra Ecosystem.” *Global Change*  
306 *Biology* 15 (11). Wiley-Blackwell: 2599–2614. doi:10.1111/j.1365-2486.2009.01962.x.
- 307 Merbold, Lutz, Werner Eugster, Jacqueline Stieger, Mark Zahniser, David Nelson, and Nina Buchmann.  
308 2014. “Greenhouse Gas Budget (CO<sub>2</sub>, CH<sub>4</sub> and N<sub>2</sub>o) of Intensively Managed Grassland Following Restoration.”  
309 *Global Change Biology* 20 (6). Wiley-Blackwell: 1913–28. doi:10.1111/gcb.12518.
- 310 Meyer, W. S., E. Kondrlovà, and G. R. Koerber. 2015. “Evaporation of Perennial Semi-Arid Woodland in  
311 Southeastern Australia Is Adapted for Irregular but Common Dry Periods.” *Hydrological Processes* 29 (17).  
312 Wiley-Blackwell: 3714–26. doi:10.1002/hyp.10467.
- 313 Migliavacca, Mirco, Michele Meroni, Lorenzo Busetto, Roberto Colombo, Terenzio Zenone, Giorgio Matteucci,  
314 Giovanni Manca, and Guenther Seufert. 2009. “Modeling Gross Primary Production of Agro-Forestry  
315 Ecosystems by Assimilation of Satellite-Derived Information in a Process-Based Model.” *Sensors* 9 (2). MDPI  
316 AG: 922–42. doi:10.3390/s90200922.
- 317 Mkhabela, M.S., B.D. Amiro, A.G. Barr, T.A. Black, I. Hawthorne, J. Kidston, J.H. McCaughey, et  
318 al. 2009a. “Comparison of Carbon Dynamics and Water Use Efficiency Following Fire and Harvest-  
319 ing in Canadian Boreal Forests.” *Agricultural and Forest Meteorology* 149 (5). Elsevier BV: 783–94.  
320 doi:10.1016/j.agrformet.2008.10.025.
- 321 ———. 2009b. “Comparison of Carbon Dynamics and Water Use Efficiency Following Fire and Har-  
322 vesting in Canadian Boreal Forests.” *Agricultural and Forest Meteorology* 149 (5). Elsevier BV: 783–94.  
323 doi:10.1016/j.agrformet.2008.10.025.
- 324 ———. 2009c. “Comparison of Carbon Dynamics and Water Use Efficiency Following Fire and Har-  
325 vesting in Canadian Boreal Forests.” *Agricultural and Forest Meteorology* 149 (5). Elsevier BV: 783–94.  
326 doi:10.1016/j.agrformet.2008.10.025.
- 327 Molen, M. K. van der, J. van Huissteden, F. J. W. Parmentier, A. M. R. Petrescu, A. J. Dolman, T. C.  
328 Maximov, A. V. Kononov, S. V. Karsanaev, and D. A. Suzdalov. 2007. “The Growing Season Greenhouse  
329 Gas Balance of a Continental Tundra Site in the Indigirka Lowlands, NE Siberia.” *Biogeosciences* 4 (6).  
330 Copernicus GmbH: 985–1003. doi:10.5194/bg-4-985-2007.
- 331 Monson, R. K., A. A. Turnipseed, J. P. Sparks, P. C. Harley, L. E. Scott-Denton, K. Sparks, and T. E.  
332 Huxman. 2002. “Carbon Sequestration in a High-Elevation, Subalpine Forest.” *Global Change Biology* 8 (5).  
333 Wiley-Blackwell: 459–78. doi:10.1046/j.1365-2486.2002.00480.x.
- 334 Montagnani, Leonardo, Giovanni Manca, Elisa Canepa, Emilia Georgieva, Manuel Acosta, Christian Feigen-  
335 winter, Dalibor Janous, et al. 2009. “A New Mass Conservation Approach to the Study of CO<sub>2</sub> advection in  
336 an Alpine Forest.” *Journal of Geophysical Research* 114 (D7). Wiley-Blackwell. doi:10.1029/2008jd010650.
- 337 Morin, T. H., G. Bohrer, R. P. d. M. Frasson, L. Naor-Azreli, S. Mesi, K. C. Stefanik, and K. V. R. Schäfer.  
338 2014. “Environmental Drivers of Methane Fluxes from an Urban Temperate Wetland Park.” *Journal of*  
339 *Geophysical Research: Biogeosciences* 119 (11). Wiley-Blackwell: 2188–2208. doi:10.1002/2014jg002750.
- 340 Moureaux, Christine, Alain Debacq, Bernard Bodson, Bernard Heinesch, and Marc Aubinet. 2006. “Annual  
341 Net Ecosystem Carbon Exchange by a Sugar Beet Crop.” *Agricultural and Forest Meteorology* 139 (1-2).

- 342 Elsevier BV: 25–39. doi:10.1016/j.agrformet.2006.05.009.
- 343 Nakai, Taro, Yongwon Kim, Robert C. Busey, Rikie Suzuki, Shin Nagai, Hideki Kobayashi, Hotaek Park,  
344 Konosuke Sugiura, and Akihiko Ito. 2013. “Characteristics of Evapotranspiration from a Permafrost Black  
345 Spruce Forest in Interior Alaska.” *Polar Science* 7 (2). Elsevier BV: 136–48. doi:10.1016/j.polar.2013.03.003.
- 346 Noormets, Asko, Jiquan Chen, and Thomas R. Crow. 2007a. “Age-Dependent Changes in Ecosystem Carbon  
347 Fluxes in Managed Forests in Northern Wisconsin, USA.” *Ecosystems* 10 (2). Springer Nature: 187–203.  
348 doi:10.1007/s10021-007-9018-y.
- 349 ———. 2007b. “Age-Dependent Changes in Ecosystem Carbon Fluxes in Managed Forests in Northern  
350 Wisconsin, USA.” *Ecosystems* 10 (2). Springer Nature: 187–203. doi:10.1007/s10021-007-9018-y.
- 351 ———. 2007c. “Age-Dependent Changes in Ecosystem Carbon Fluxes in Managed Forests in Northern  
352 Wisconsin, USA.” *Ecosystems* 10 (2). Springer Nature: 187–203. doi:10.1007/s10021-007-9018-y.
- 353 ———. 2007d. “Age-Dependent Changes in Ecosystem Carbon Fluxes in Managed Forests in Northern  
354 Wisconsin, USA.” *Ecosystems* 10 (2). Springer Nature: 187–203. doi:10.1007/s10021-007-9018-y.
- 355 ———. 2007e. “Age-Dependent Changes in Ecosystem Carbon Fluxes in Managed Forests in Northern  
356 Wisconsin, USA.” *Ecosystems* 10 (2). Springer Nature: 187–203. doi:10.1007/s10021-007-9018-y.
- 357 Oikawa, P. Y., G. D. Jenerette, S. H. Knox, C. Sturtevant, J. Verfaillie, I. Dronova, C. M. Poindexter,  
358 E. Eichelmann, and D. D. Baldocchi. 2017. “Evaluation of a Hierarchy of Models Reveals Importance of  
359 Substrate Limitation for Predicting Carbon Dioxide and Methane Exchange in Restored Wetlands.” *Journal*  
360 *of Geophysical Research: Biogeosciences* 122 (1). Wiley-Blackwell: 145–67. doi:10.1002/2016jg003438.
- 361 Papale, Dario, Mirco Migliavacca, Edoardo Cremonese, Alessandro Cescatti, Giorgio Alberti, Manuela  
362 Balzarolo, Luca Beletti Marchesini, et al. 2014. “Carbon, Water and Energy Fluxes of Terrestrial Ecosystems  
363 in Italy.” In *The Greenhouse Gas Balance of Italy*, 11–45. Springer Berlin Heidelberg. doi:10.1007/978-3-642-  
364 32424-6\\_2.
- 365 Pilegaard, Kim, Andreas Ibrom, Michael S. Courtney, Poul Hummelshøj, and Niels Otto Jensen. 2011.  
366 “Increasing Net CO<sub>2</sub> Uptake by a Danish Beech Forest During the Period from 1996 to 2009.” *Agricultural*  
367 *and Forest Meteorology* 151 (7). Elsevier BV: 934–46. doi:10.1016/j.agrformet.2011.02.013.
- 368 Posse, G, N Lewczuk, K Richter, and P Cristiano. 2016. “Carbon and Water Vapor Balance in a Subtropical  
369 Pine Plantation.” *iForest - Biogeosciences and Forestry* 9 (5). Italian Society of Silviculture; Forest Ecology  
370 (SISEF): 736–42. doi:10.3832/ifor1815-009.
- 371 Post, H., H. J. Hendricks Franssen, A. Graf, M. Schmidt, and H. Vereecken. 2015. “Uncertainty Analysis of  
372 Eddy Covariance CO<sub>2</sub> Flux Measurements for Different EC Tower Distances Using an Extended Two-Tower  
373 Approach.” *Biogeosciences* 12 (4). Copernicus GmbH: 1205–21. doi:10.5194/bg-12-1205-2015.
- 374 Powell, Thomas L., Rosvel Bracho, Jiahong Li, Sabina Dore, C. Ross Hinkle, and Bert G. Drake. 2006.  
375 “Environmental Controls over Net Ecosystem Carbon Exchange of Scrub Oak in Central Florida.” *Agricultural*  
376 *and Forest Meteorology* 141 (1). Elsevier BV: 19–34. doi:10.1016/j.agrformet.2006.09.002.
- 377 Prescher, Anne-Katrin, Thomas Grünwald, and Christian Bernhofer. 2010a. “Land Use Regulates Carbon  
378 Budgets in Eastern Germany: From NEE to NBP.” *Agricultural and Forest Meteorology* 150 (7-8). Elsevier  
379 BV: 1016–25. doi:10.1016/j.agrformet.2010.03.008.
- 380 ———. 2010b. “Land Use Regulates Carbon Budgets in Eastern Germany: From NEE to NBP.” *Agricultural*  
381 *and Forest Meteorology* 150 (7-8). Elsevier BV: 1016–25. doi:10.1016/j.agrformet.2010.03.008.
- 382 Rambal, S., R. Joffre, J. M. Ourcival, J. Cavender-Bares, and A. Rocheteau. 2004. “The Growth Respiration  
383 Component in Eddy CO<sub>2</sub> Flux from a Quercus Ilex Mediterranean Forest.” *Global Change Biology* 10 (9).  
384 Wiley-Blackwell: 1460–9. doi:10.1111/j.1365-2486.2004.00819.x.
- 385 Raz-Yaseef, Naama, Dave P. Billesbach, Marc L. Fischer, Sebastien C. Biraud, Stacey A. Gunter, James A.  
386 Bradford, and Margaret S. Torn. 2015a. “Vulnerability of Crops and Native Grasses to Summer Drying in the



- 387 U.S. Southern Great Plains.” *Agriculture, Ecosystems & Environment* 213 (December). Elsevier BV: 209–18.  
388 doi:10.1016/j.agee.2015.07.021.
- 389 ———. 2015b. “Vulnerability of Crops and Native Grasses to Summer Drying in the U.S. Southern Great Plains.”  
390 *Agriculture, Ecosystems & Environment* 213 (December). Elsevier BV: 209–18. doi:10.1016/j.agee.2015.07.021.
- 391 ———. 2015c. “Vulnerability of Crops and Native Grasses to Summer Drying in the U.S. Southern Great Plains.”  
392 *Agriculture, Ecosystems & Environment* 213 (December). Elsevier BV: 209–18. doi:10.1016/j.agee.2015.07.021.
- 393 ———. 2015d. “Vulnerability of Crops and Native Grasses to Summer Drying in the U.S. Southern Great Plains.”  
394 *Agriculture, Ecosystems & Environment* 213 (December). Elsevier BV: 209–18. doi:10.1016/j.agee.2015.07.021.
- 395 Reverter, B. R., E. P. Sánchez-Cañete, V. Resco, P. Serrano-Ortiz, C. Oyonarte, and A. S. Kowalski. 2010.  
396 “Analyzing the Major Drivers of NEE in a Mediterranean Alpine Shrubland.” *Biogeosciences* 7 (9). Copernicus  
397 GmbH: 2601–11. doi:10.5194/bg-7-2601-2010.
- 398 Rey, Ana, Emiliano Pegoraro, Vanessa Tedeschi, Ilaria De Parri, Paul G. Jarvis, and Riccardo Valentini. 2002.  
399 “Annual Variation in Soil Respiration and Its Components in a Coppice Oak Forest in Central Italy.” *Global*  
400 *Change Biology* 8 (9). Wiley-Blackwell: 851–66. doi:10.1046/j.1365-2486.2002.00521.x.
- 401 Ruehr, Nadine K., Jonathan G. Martin, and Beverly E. Law. 2012. “Effects of Water Availability on Carbon  
402 and Water Exchange in a Young Ponderosa Pine Forest: Above- and Belowground Responses.” *Agricultural*  
403 *and Forest Meteorology* 164 (October). Elsevier BV: 136–48. doi:10.1016/j.agrformet.2012.05.015.
- 404 Sabbatini, S., N. Arriga, T. Bertolini, S. Castaldi, T. Chiti, C. Consalvo, S. Njakou Djomo, B. Gioli, G.  
405 Matteucci, and D. Papale. 2016a. “Greenhouse Gas Balance of Cropland Conversion to Bioenergy Poplar  
406 Short-Rotation Coppice.” *Biogeosciences* 13 (1). Copernicus GmbH: 95–113. doi:10.5194/bg-13-95-2016.
- 407 ———. 2016b. “Greenhouse Gas Balance of Cropland Conversion to Bioenergy Poplar Short-Rotation Coppice.”  
408 *Biogeosciences* 13 (1). Copernicus GmbH: 95–113. doi:10.5194/bg-13-95-2016.
- 409 ———. 2016c. “Greenhouse Gas Balance of Cropland Conversion to Bioenergy Poplar Short-Rotation Coppice.”  
410 *Biogeosciences* 13 (1). Copernicus GmbH: 95–113. doi:10.5194/bg-13-95-2016.
- 411 Schmidt, M., T.G. Reichenau, P. Fiener, and K. Schneider. 2012. “The Carbon Budget of a Winter Wheat  
412 Field: An Eddy Covariance Analysis of Seasonal and Inter-Annual Variability.” *Agricultural and Forest*  
413 *Meteorology* 165 (November). Elsevier BV: 114–26. doi:10.1016/j.agrformet.2012.05.012.
- 414 Scott, Russell L., Joel A. Biederman, Erik P. Hamerlynck, and Greg A. Barron-Gafford. 2015a. “The Carbon  
415 Balance Pivot Point of Southwestern U.S. Semiarid Ecosystems: Insights from the 21st Century Drought.” *Journal*  
416 *of Geophysical Research: Biogeosciences* 120 (12). Wiley-Blackwell: 2612–24. doi:10.1002/2015jg003181.
- 417 ———. 2015b. “The Carbon Balance Pivot Point of Southwestern U.S. Semiarid Ecosystems: Insights from the  
418 21st Century Drought.” *Journal of Geophysical Research: Biogeosciences* 120 (12). Wiley-Blackwell: 2612–24.  
419 doi:10.1002/2015jg003181.
- 420 Scott, Russell L., Erik P. Hamerlynck, G. Darrel Jenerette, M. Susan Moran, and Greg A. Barron-Gafford.  
421 2010. “Carbon Dioxide Exchange in a Semidesert Grassland Through Drought-Induced Vegetation Change.”  
422 *Journal of Geophysical Research* 115 (G3). Wiley-Blackwell. doi:10.1029/2010jg001348.
- 423 Scott, Russell L., G. Darrel Jenerette, Daniel L. Potts, and Travis E. Huxman. 2009. “Effects of Seasonal  
424 Drought on Net Carbon Dioxide Exchange from a Woody-Plant-Encroached Semiarid Grassland.” *Journal of*  
425 *Geophysical Research* 114 (G4). Wiley-Blackwell. doi:10.1029/2008jg000900.
- 426 Shi, Peili, Xiaomin Sun, Lingling Xu, Xianzhou Zhang, Yongtao He, Dongqiu Zhang, and Guirui Yu. 2006.  
427 “Net Ecosystem CO<sub>2</sub> Exchange and Controlling Factors in a SteppeKobresia Meadow on the Tibetan Plateau.”  
428 *Science in China Series D: Earth Sciences* 49 (S2). Springer Nature: 207–18. doi:10.1007/s11430-006-8207-4.
- 429 Stevens, Rob M., Caecilia M. Ewenz, Gary Grigson, and Samantha M. Conner. 2011. “Water Use by an  
430 Irrigated Almond Orchard.” *Irrigation Science* 30 (3). Springer Nature: 189–200. doi:10.1007/s00271-011-  
431 0270-8.
- 432 Stiegler, Christian, Magnus Lund, Torben Røjle Christensen, Mikhail Mastepanov, and Anders Lindroth.

- 433 2016. “Two Years with Extreme and Little Snowfall: Effects on Energy Partitioning and Surface Energy  
434 Exchange in a High-Arctic Tundra Ecosystem.” *The Cryosphere* 10 (4). Copernicus GmbH: 1395–1413.  
435 doi:10.5194/tc-10-1395-2016.
- 436 Sulman, B. N., A. R. Desai, B. D. Cook, N. Saliendra, and D. S. Mackay. 2009. “Contrasting Carbon Dioxide  
437 Fluxes Between a Drying Shrub Wetland in Northern Wisconsin, USA, and Nearby Forests.” *Biogeosciences* 6  
438 (6). Copernicus GmbH: 1115–26. doi:10.5194/bg-6-1115-2009.
- 439 Tagesson, Torbern, Rasmus Fensholt, Idrissa Guiro, Mads Olander Rasmussen, Silvia Huber, Cheikh Mbow,  
440 Monica Garcia, et al. 2014. “Ecosystem Properties of Semiarid Savanna Grassland in West Africa and  
441 Its Relationship with Environmental Variability.” *Global Change Biology* 21 (1). Wiley-Blackwell: 250–64.  
442 doi:10.1111/gcb.12734.
- 443 Tedeschi, Vanessa, Ana Rey, Giovanni Manca, Riccardo Valentini, Paul G. Jarvis, and Marco Borghetti. 2006.  
444 “Soil Respiration in a Mediterranean Oak Forest at Different Developmental Stages After Coppicing.” *Global  
445 Change Biology* 12 (1). Wiley-Blackwell: 110–21. doi:10.1111/j.1365-2486.2005.01081.x.
- 446 Thum, Tea, Tuula Aalto, Tuomas Laurila, Mika Aurela, Pasi Kolari, and Pertti Hari. 2007. “Parametrization  
447 of Two Photosynthesis Models at the Canopy Scale in a Northern Boreal Scots Pine Forest.” *Tellus B* 59 (5).  
448 Informa UK Limited. doi:10.3402/tellusb.v59i5.17066.
- 449 Ulke, Ana Graciela, Natalia Noemí Gattinoni, and Gabriela Posse. 2015. “Analysis and Modelling of Turbulent  
450 Fluxes in Two Different Ecosystems in Argentina.” *International Journal of Environment and Pollution* 58  
451 (1/2). Inderscience Publishers: 52. doi:10.1504/ijep.2015.076583.
- 452 Urbanski, S., C. Barford, S. Wofsy, C. Kucharik, E. Pyle, J. Budney, K. McKain, D. Fitzjarrald, M. Czikowsky,  
453 and J. W. Munger. 2007. “Factors Controlling CO<sub>2</sub> exchange on Timescales from Hourly to Decadal at  
454 Harvard Forest.” *Journal of Geophysical Research* 112 (G2). Wiley-Blackwell. doi:10.1029/2006jg000293.
- 455 Valentini, R., P. Angelis, G. Matteucci, R. Monaco, S. Dore, and G. E. Scarascia Mucnozza. 1996. “Seasonal  
456 Net Carbon Dioxide Exchange of a Beech Forest with the Atmosphere.” *Global Change Biology* 2 (3).  
457 Wiley-Blackwell: 199–207. doi:10.1111/j.1365-2486.1996.tb00072.x.
- 458 Verma, Shashi B., Achim Dobermann, Kenneth G. Cassman, Daniel T. Walters, Johannes M. Knops,  
459 Timothy J. Arkebauer, Andrew E. Suyker, et al. 2005a. “Annual Carbon Dioxide Exchange in Irrigated and  
460 Rainfed Maize-Based Agroecosystems.” *Agricultural and Forest Meteorology* 131 (1-2). Elsevier BV: 77–96.  
461 doi:10.1016/j.agrformet.2005.05.003.
- 462 ———. 2005b. “Annual Carbon Dioxide Exchange in Irrigated and Rainfed Maize-Based Agroecosystems.”  
463 *Agricultural and Forest Meteorology* 131 (1-2). Elsevier BV: 77–96. doi:10.1016/j.agrformet.2005.05.003.
- 464 ———. 2005c. “Annual Carbon Dioxide Exchange in Irrigated and Rainfed Maize-Based Agroecosystems.”  
465 *Agricultural and Forest Meteorology* 131 (1-2). Elsevier BV: 77–96. doi:10.1016/j.agrformet.2005.05.003.
- 466 Vitale, Luca, Paul Di Tommasi, Guido D’Urso, and Vincenzo Magliulo. 2015. “The Response of Ecosystem  
467 Carbon Fluxes to LAI and Environmental Drivers in a Maize Crop Grown in Two Contrasting Seasons.”  
468 *International Journal of Biometeorology* 60 (3). Springer Nature: 411–20. doi:10.1007/s00484-015-1038-2.
- 469 Westergaard-Nielsen, Andreas, Magnus Lund, Birger Ulf Hansen, and Mikkel Peter Tamstorf. 2013. “Cam-  
470 era Derived Vegetation Greenness Index as Proxy for Gross Primary Production in a Low Arctic Wet-  
471 land Area.” *ISPRS Journal of Photogrammetry and Remote Sensing* 86 (December). Elsevier BV: 89–99.  
472 doi:10.1016/j.isprsjprs.2013.09.006.
- 473 Wick, B., E. Veldkamp, W. Z. de Mello, M. Keller, and P. Crill. 2005. “Nitrous Oxide Fluxes and Nitrogen  
474 Cycling Along a Pasture Chronosequence in Central Amazonia, Brazil.” *Biogeosciences* 2 (2). Copernicus  
475 GmbH: 175–87. doi:10.5194/bg-2-175-2005.
- 476 Wohlfahrt, Georg, Albin Hammerle, Alois Haslwanter, Michael Bahn, Ulrike Tappeiner, and Alexander  
477 Cernusca. 2008. “Seasonal and Inter-Annual Variability of the Net Ecosystem CO<sub>2</sub> exchange of a Temperate

- 478 Mountain Grassland: Effects of Weather and Management.” *Journal of Geophysical Research* 113 (D8).  
479 Wiley-Blackwell. doi:10.1029/2007jd009286.
- 480 Yee, Mei Sun, Valentijn R.N. Pauwels, Edoardo Daly, Jason Beringer, Christoph Rüdiger, Matthew F. McCabe,  
481 and Jeffrey P. Walker. 2015. “A Comparison of Optical and Microwave Scintillometers with Eddy Covariance  
482 Derived Surface Heat Fluxes.” *Agricultural and Forest Meteorology* 213 (November). Elsevier BV: 226–39.  
483 doi:10.1016/j.agrformet.2015.07.004.
- 484 Zeller, K.F., and N.T. Nikolov. 2000. “Quantifying Simultaneous Fluxes of Ozone, Carbon Dioxide and  
485 Water Vapor Above a Subalpine Forest Ecosystem.” *Environmental Pollution* 107 (1). Elsevier BV: 1–20.  
486 doi:10.1016/s0269-7491(99)00156-6.
- 487 Zielis, S., S. Etzold, R. Zweifel, W. Eugster, M. Haeni, and N. Buchmann. 2014. “NEP of a Swiss Subalpine  
488 Forest Is Significantly Driven Not Only by Current but Also by Previous Years Weather.” *Biogeosciences* 11  
489 (6). Copernicus GmbH: 1627–35. doi:10.5194/bg-11-1627-2014.
